# Supplementary material
Source: publisher figshare collection journal article supplement (https://gsajournals.figshare.com/articles/dataset/_/8300543)

## Enrichment of Genes Significantly Correlated with RBMS3\_MSI2 in All

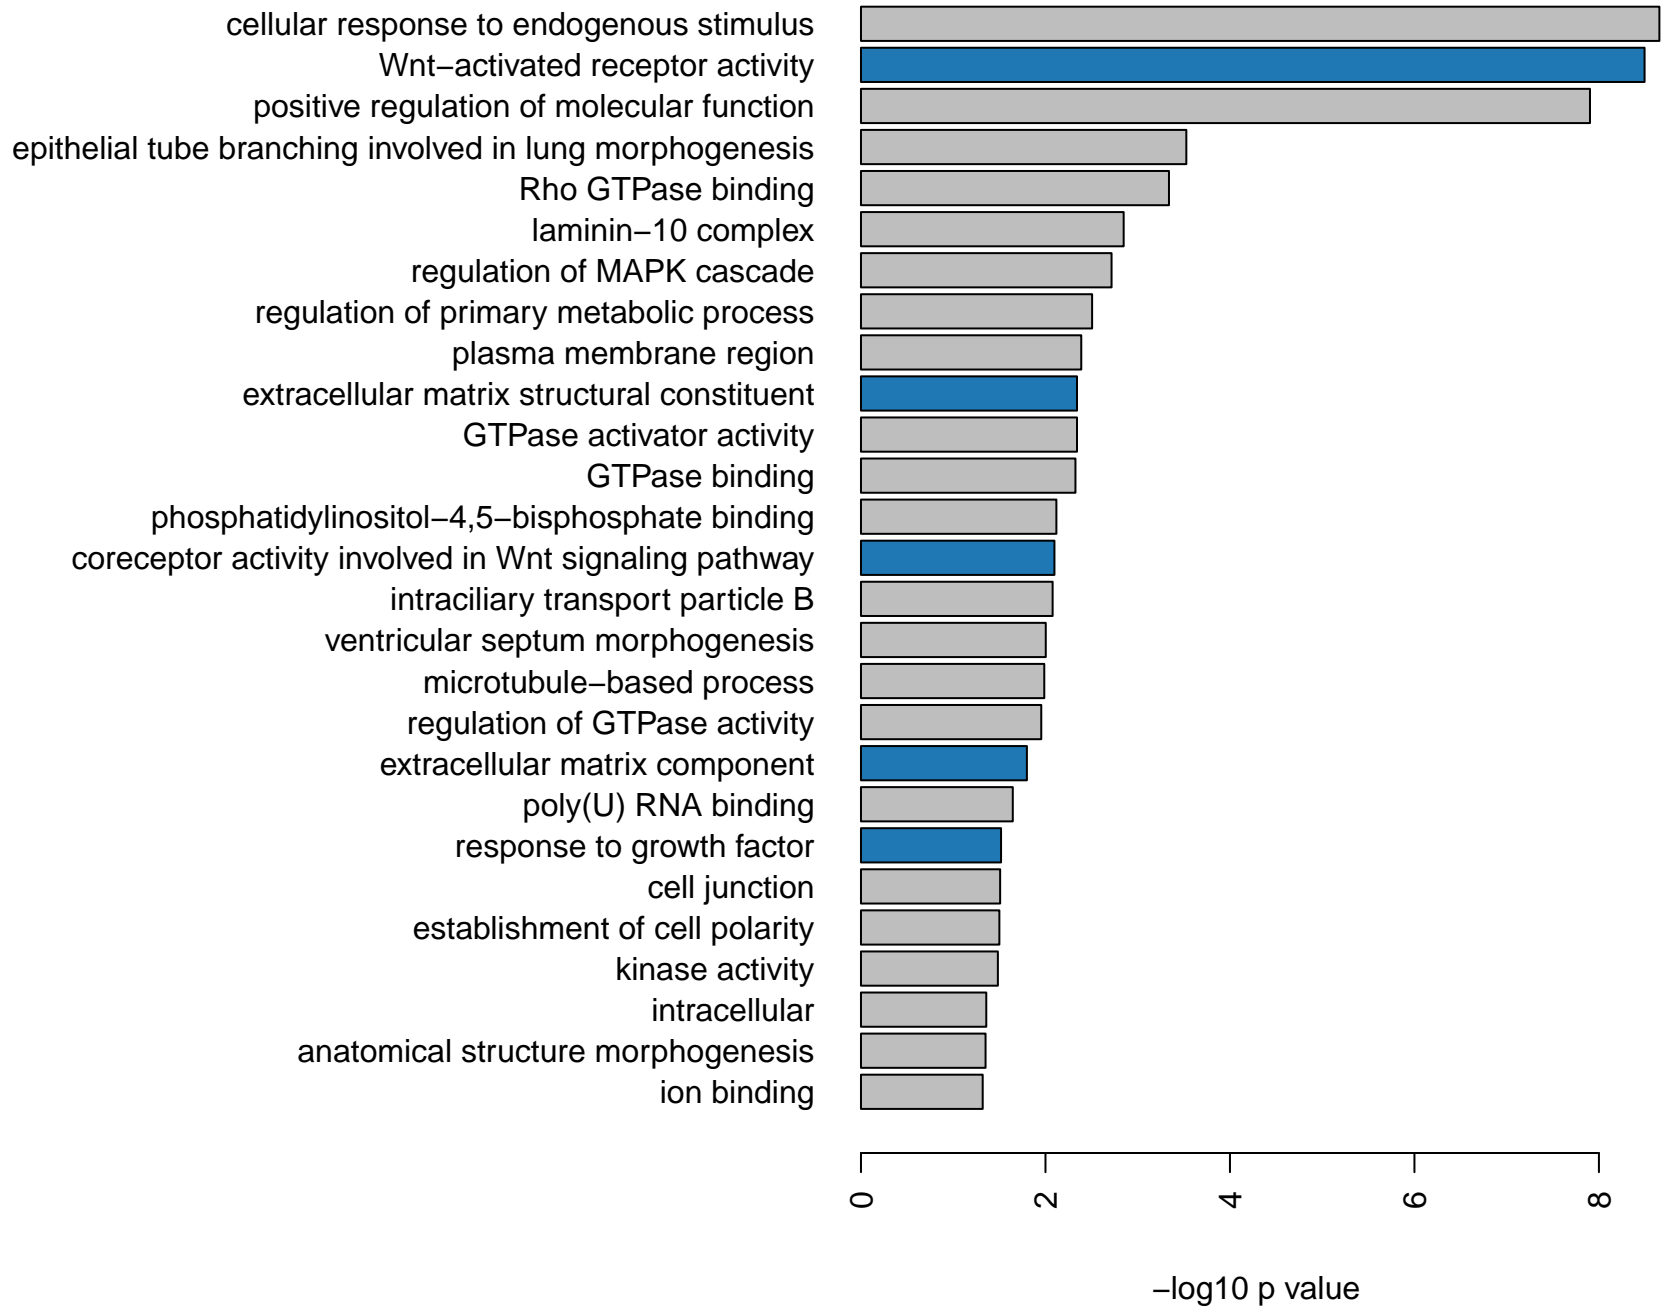

## Enrichment of Genes Significantly Correlated with RBMS3\_MSI2 in Autoimmune

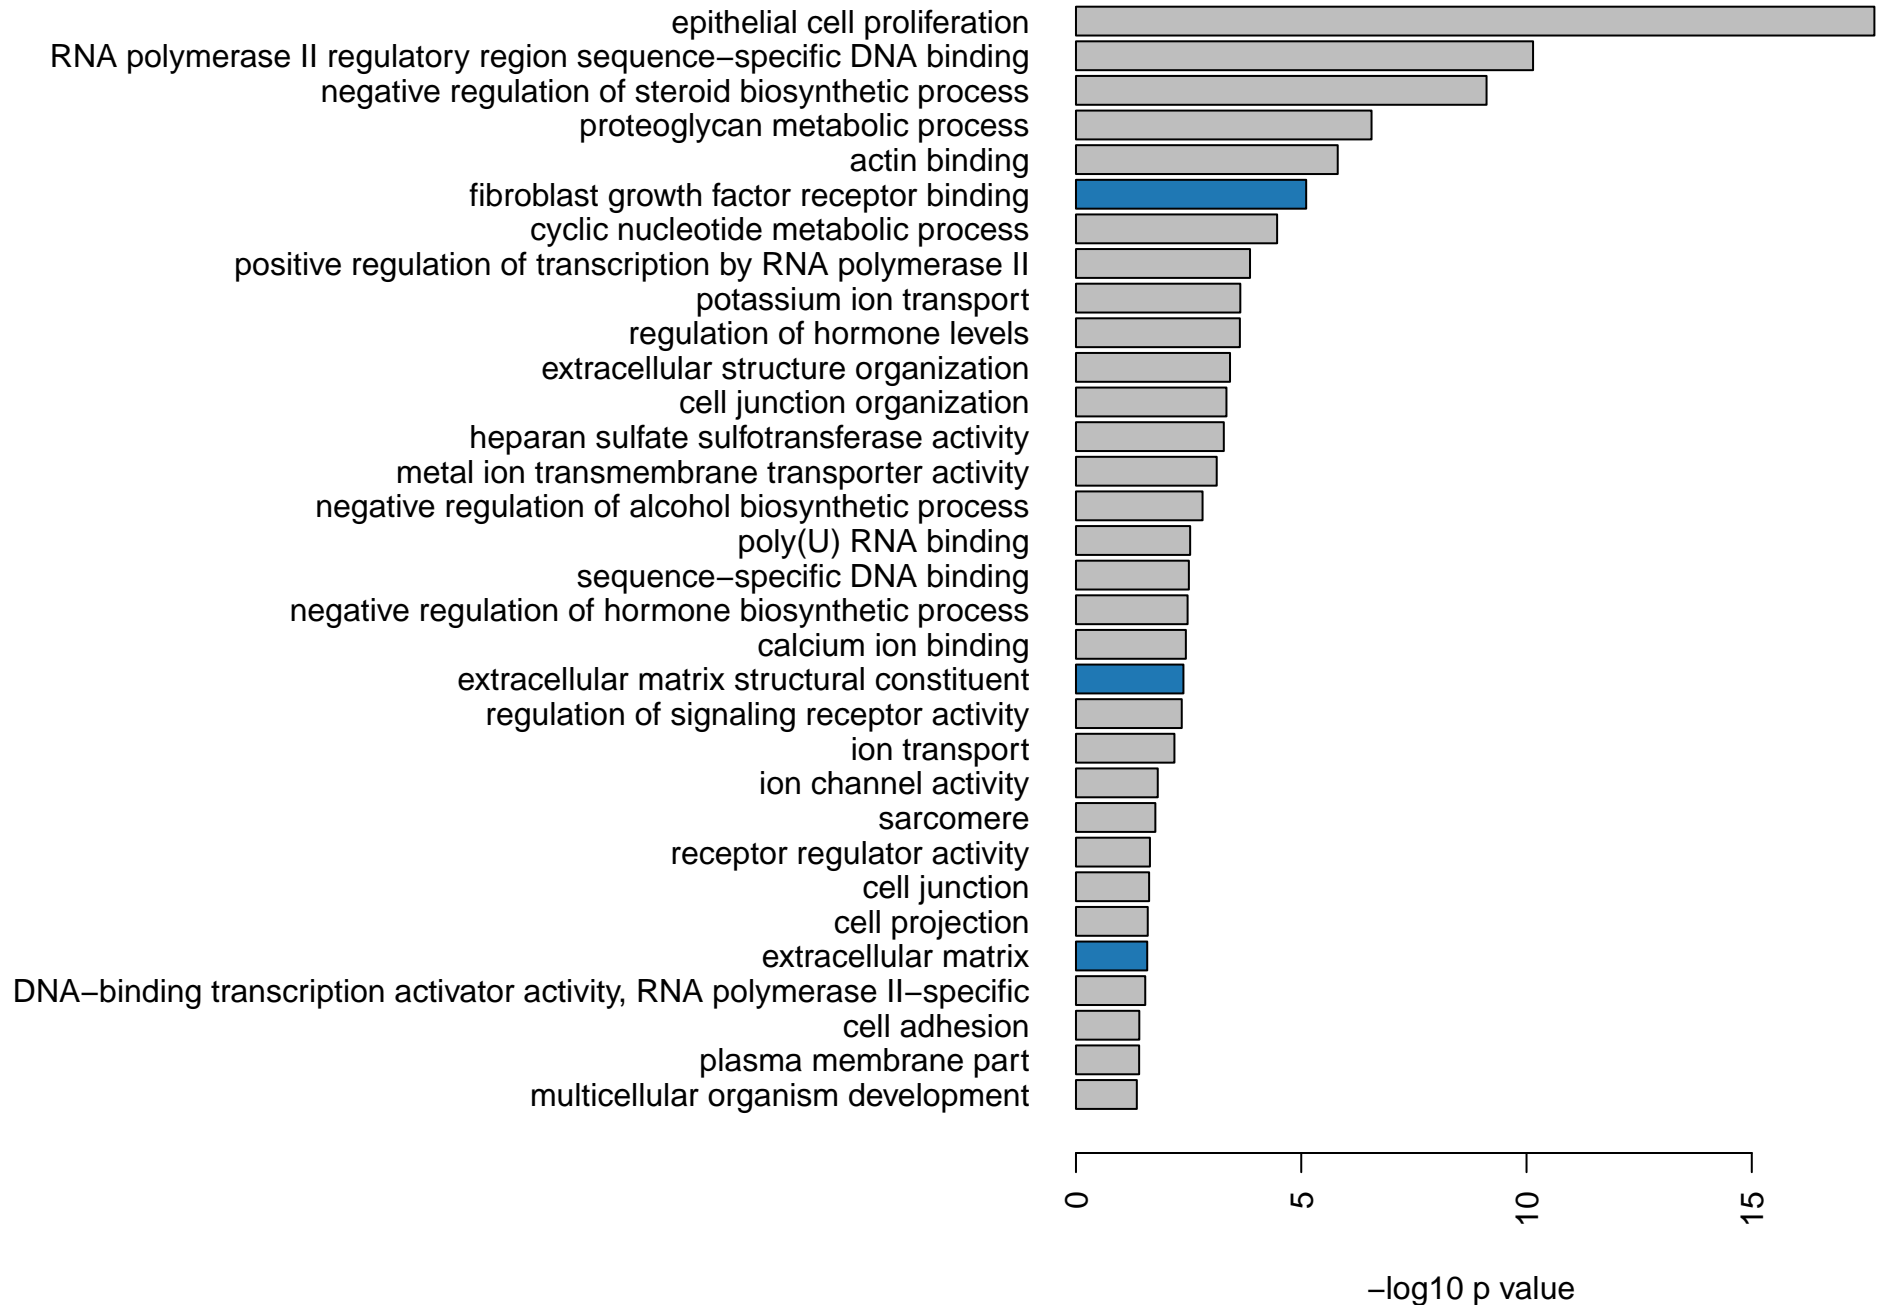

## Enrichment of Genes Significantly Correlated with RBMS3\_MSI2 in EMT

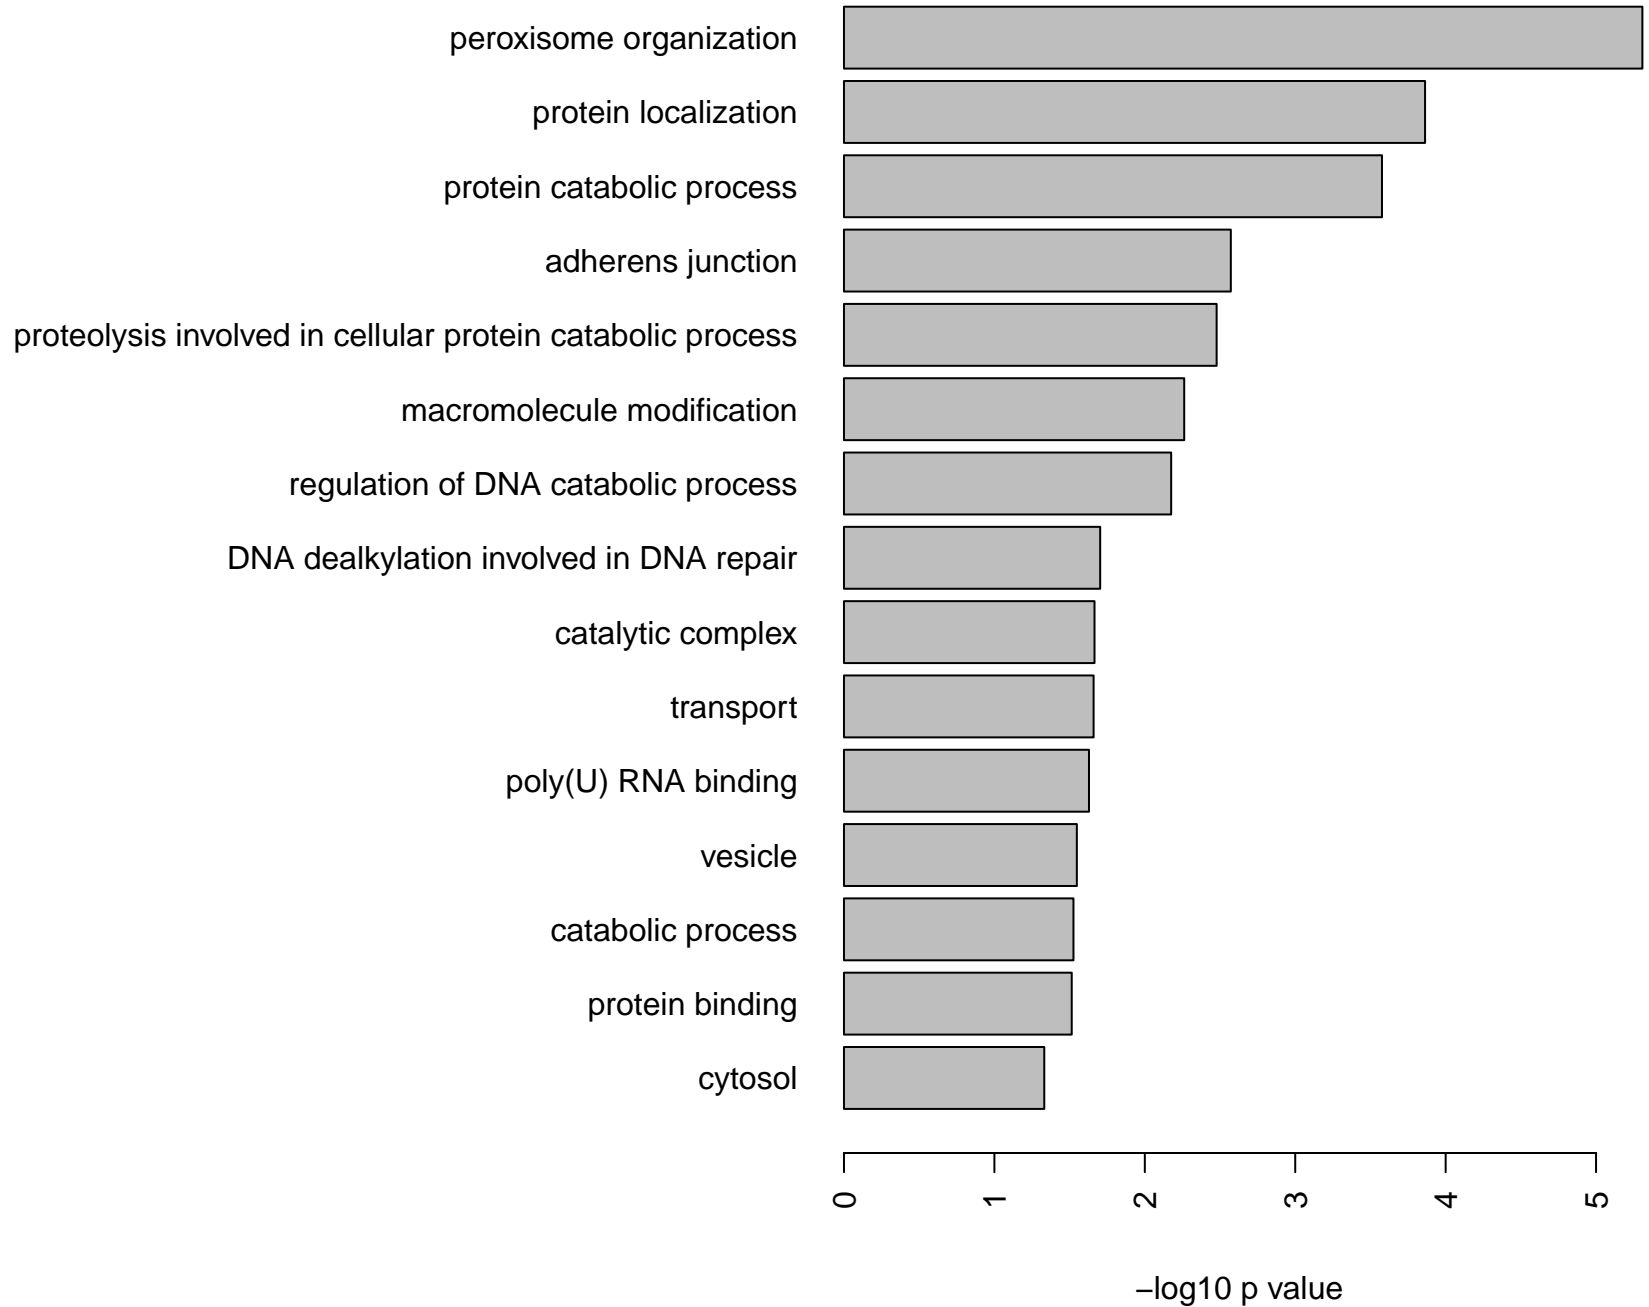

## Enrichment of Genes Significantly Correlated with RBMS3\_MSI2 in Fibrosis

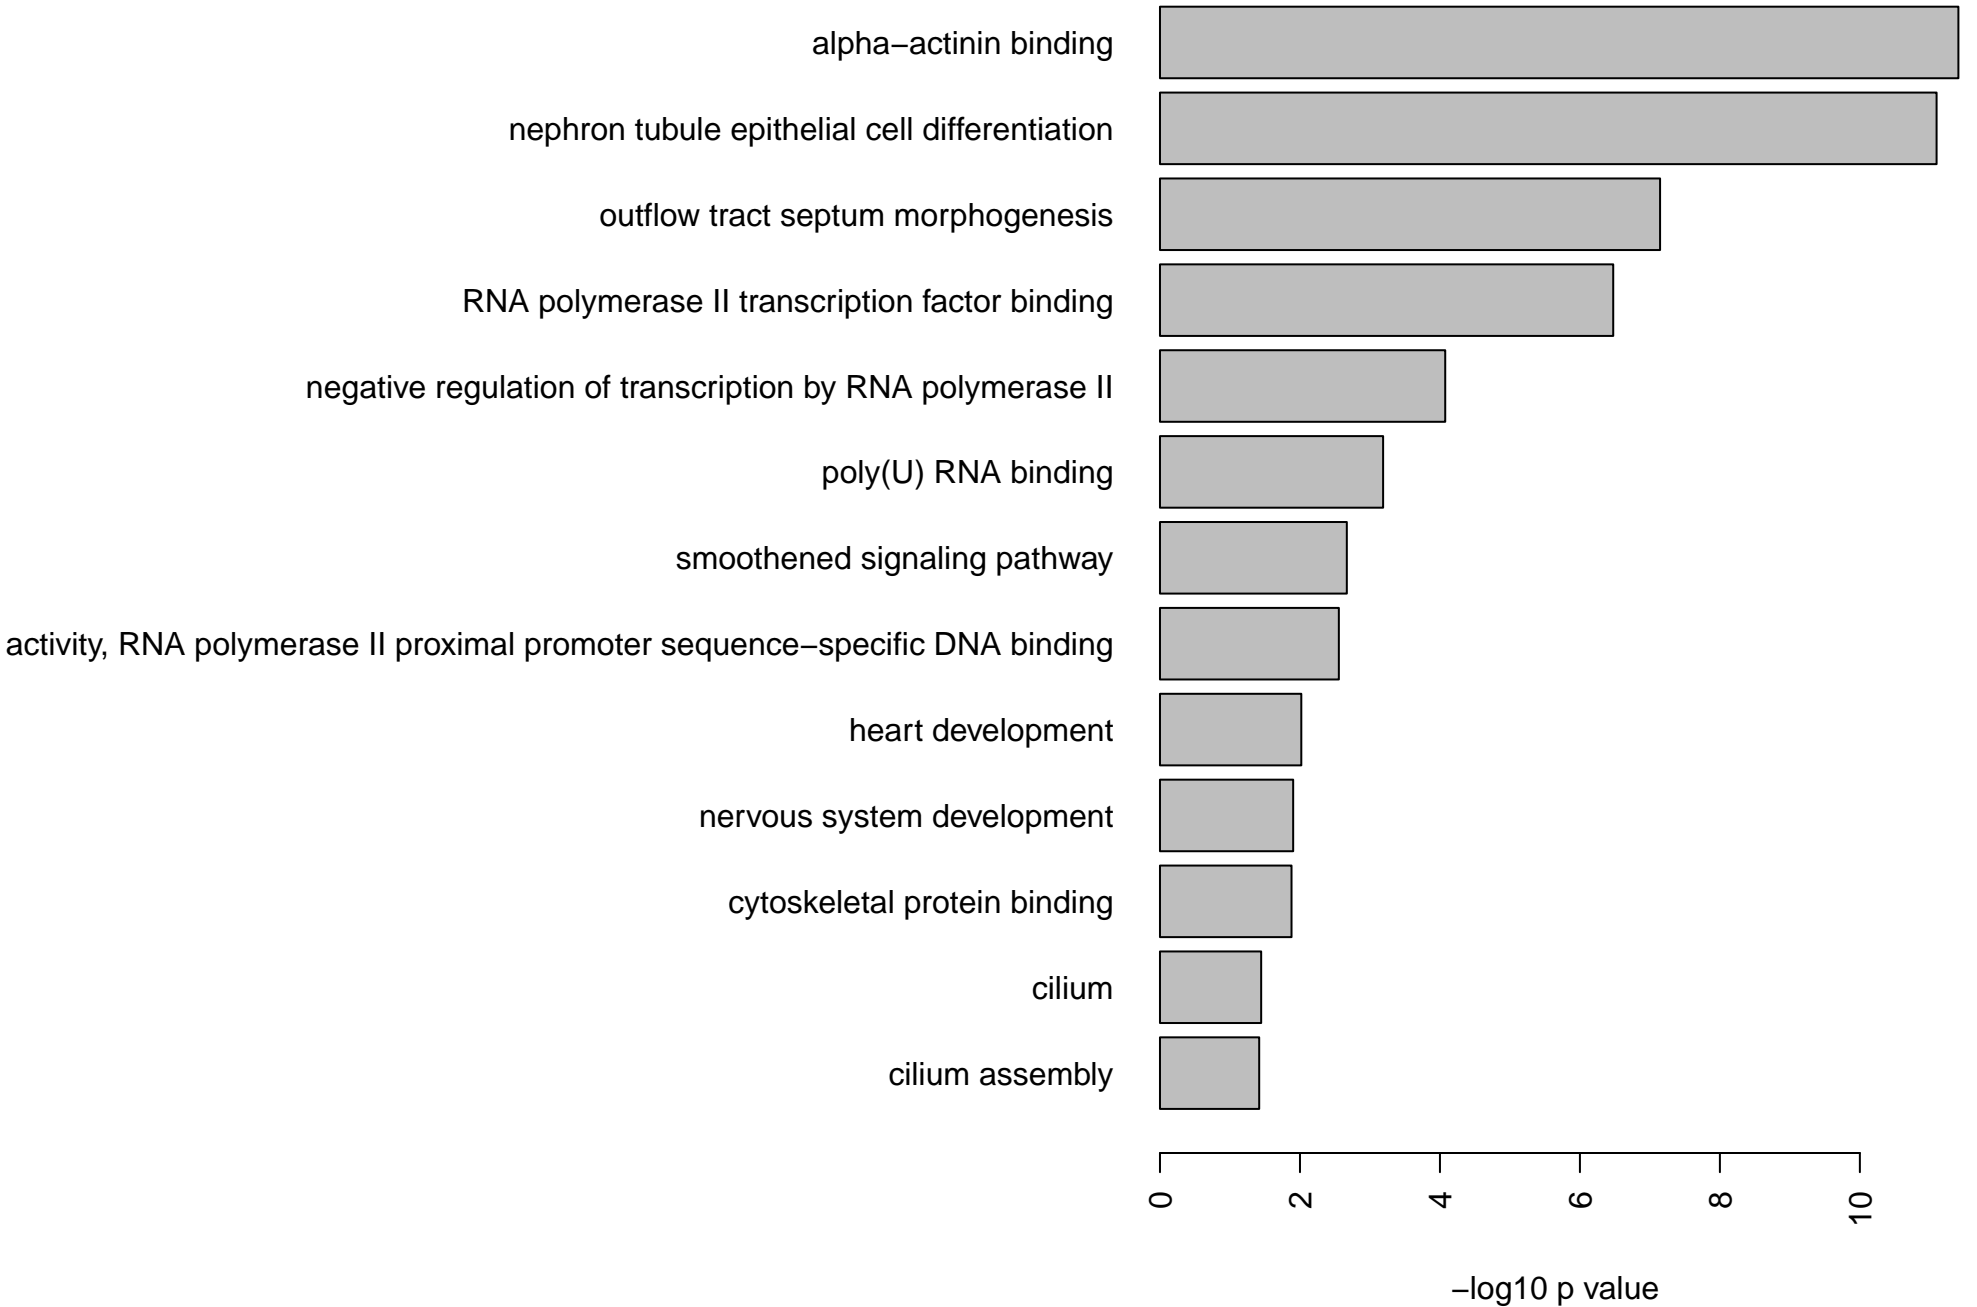

## Enrichment of Genes Significantly Correlated with RBMS3\_MSI2 in ILD\_PAH

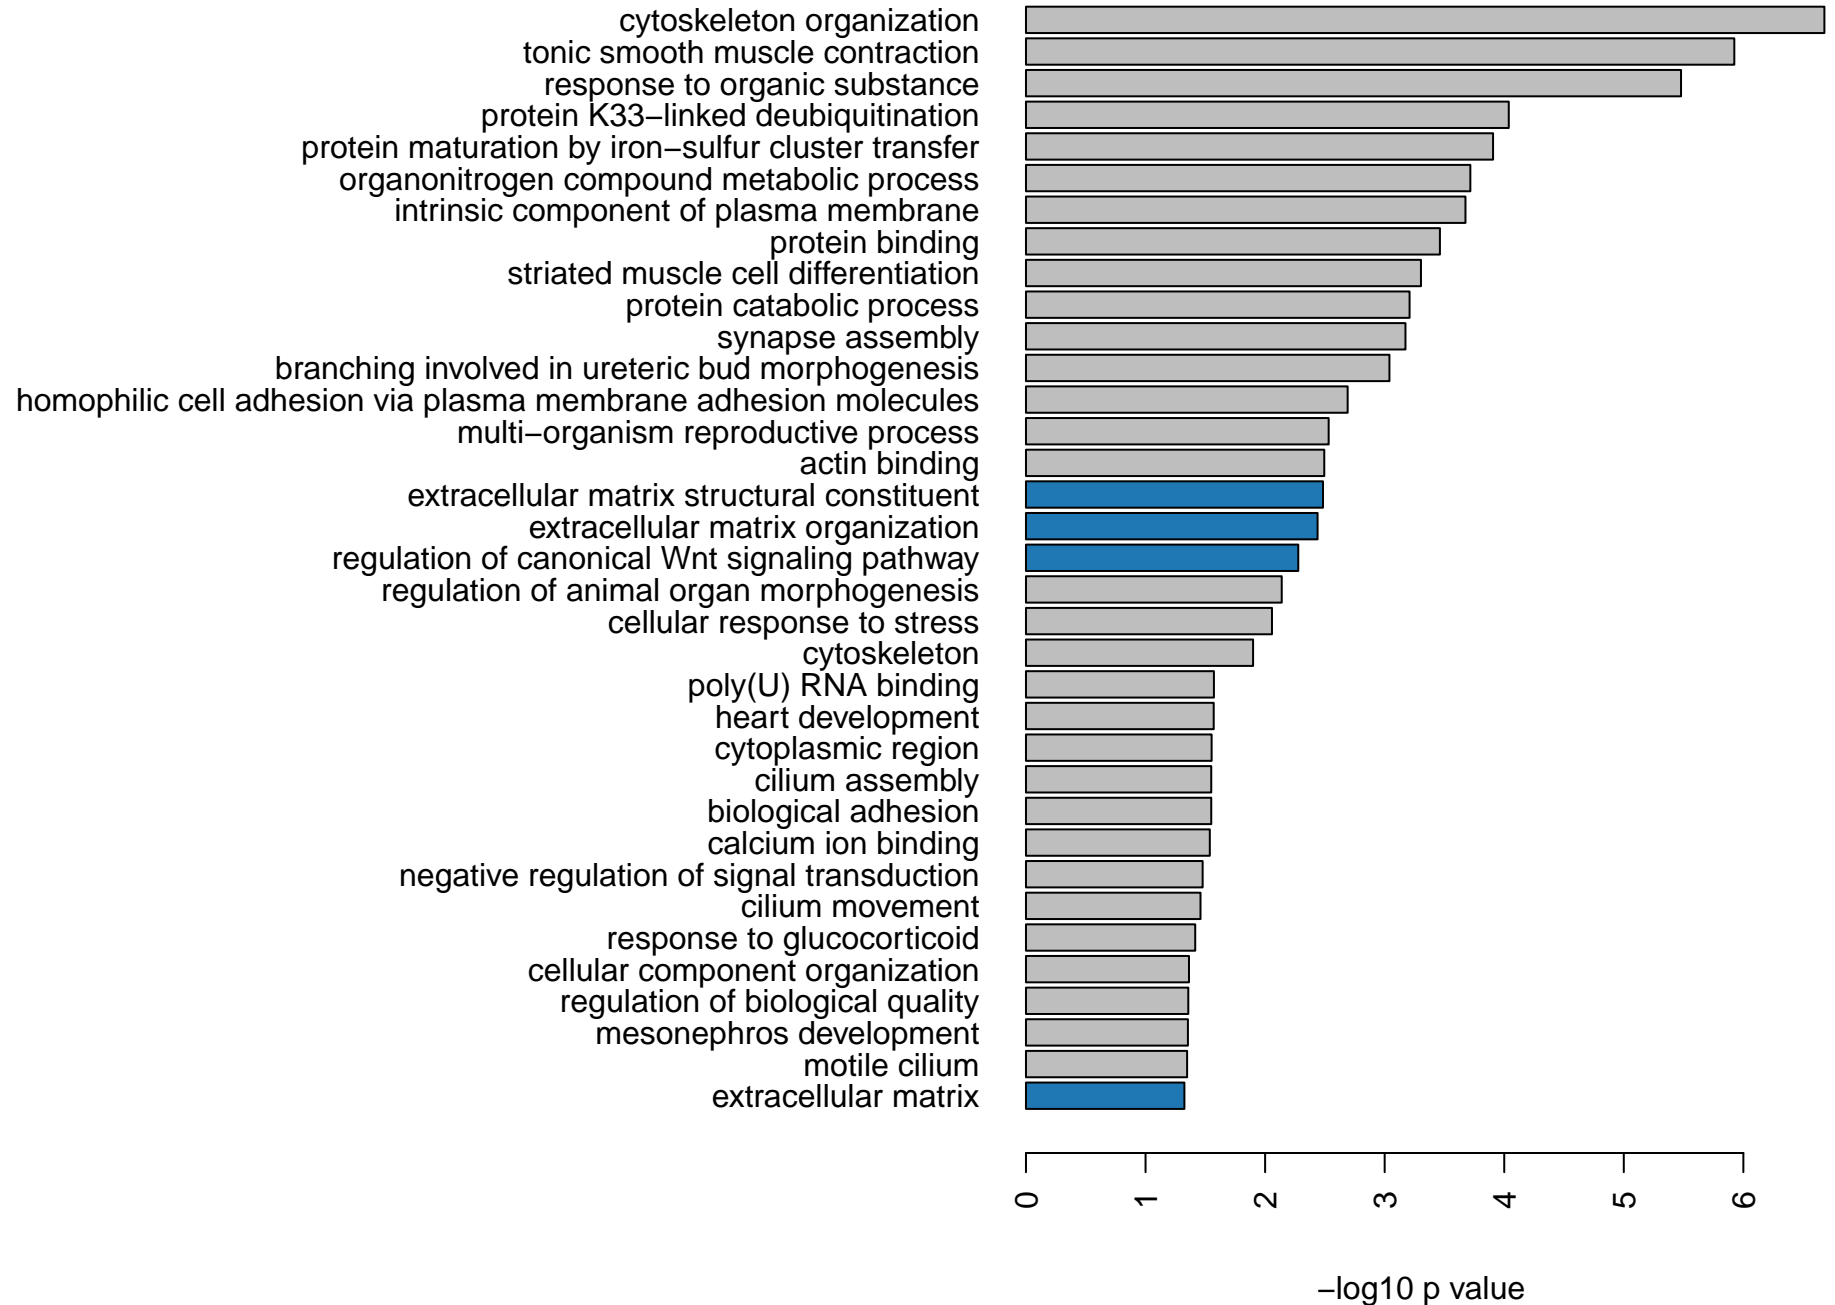

## Enrichment of Genes Significantly Correlated with RBMS3\_MSI2 in Lung

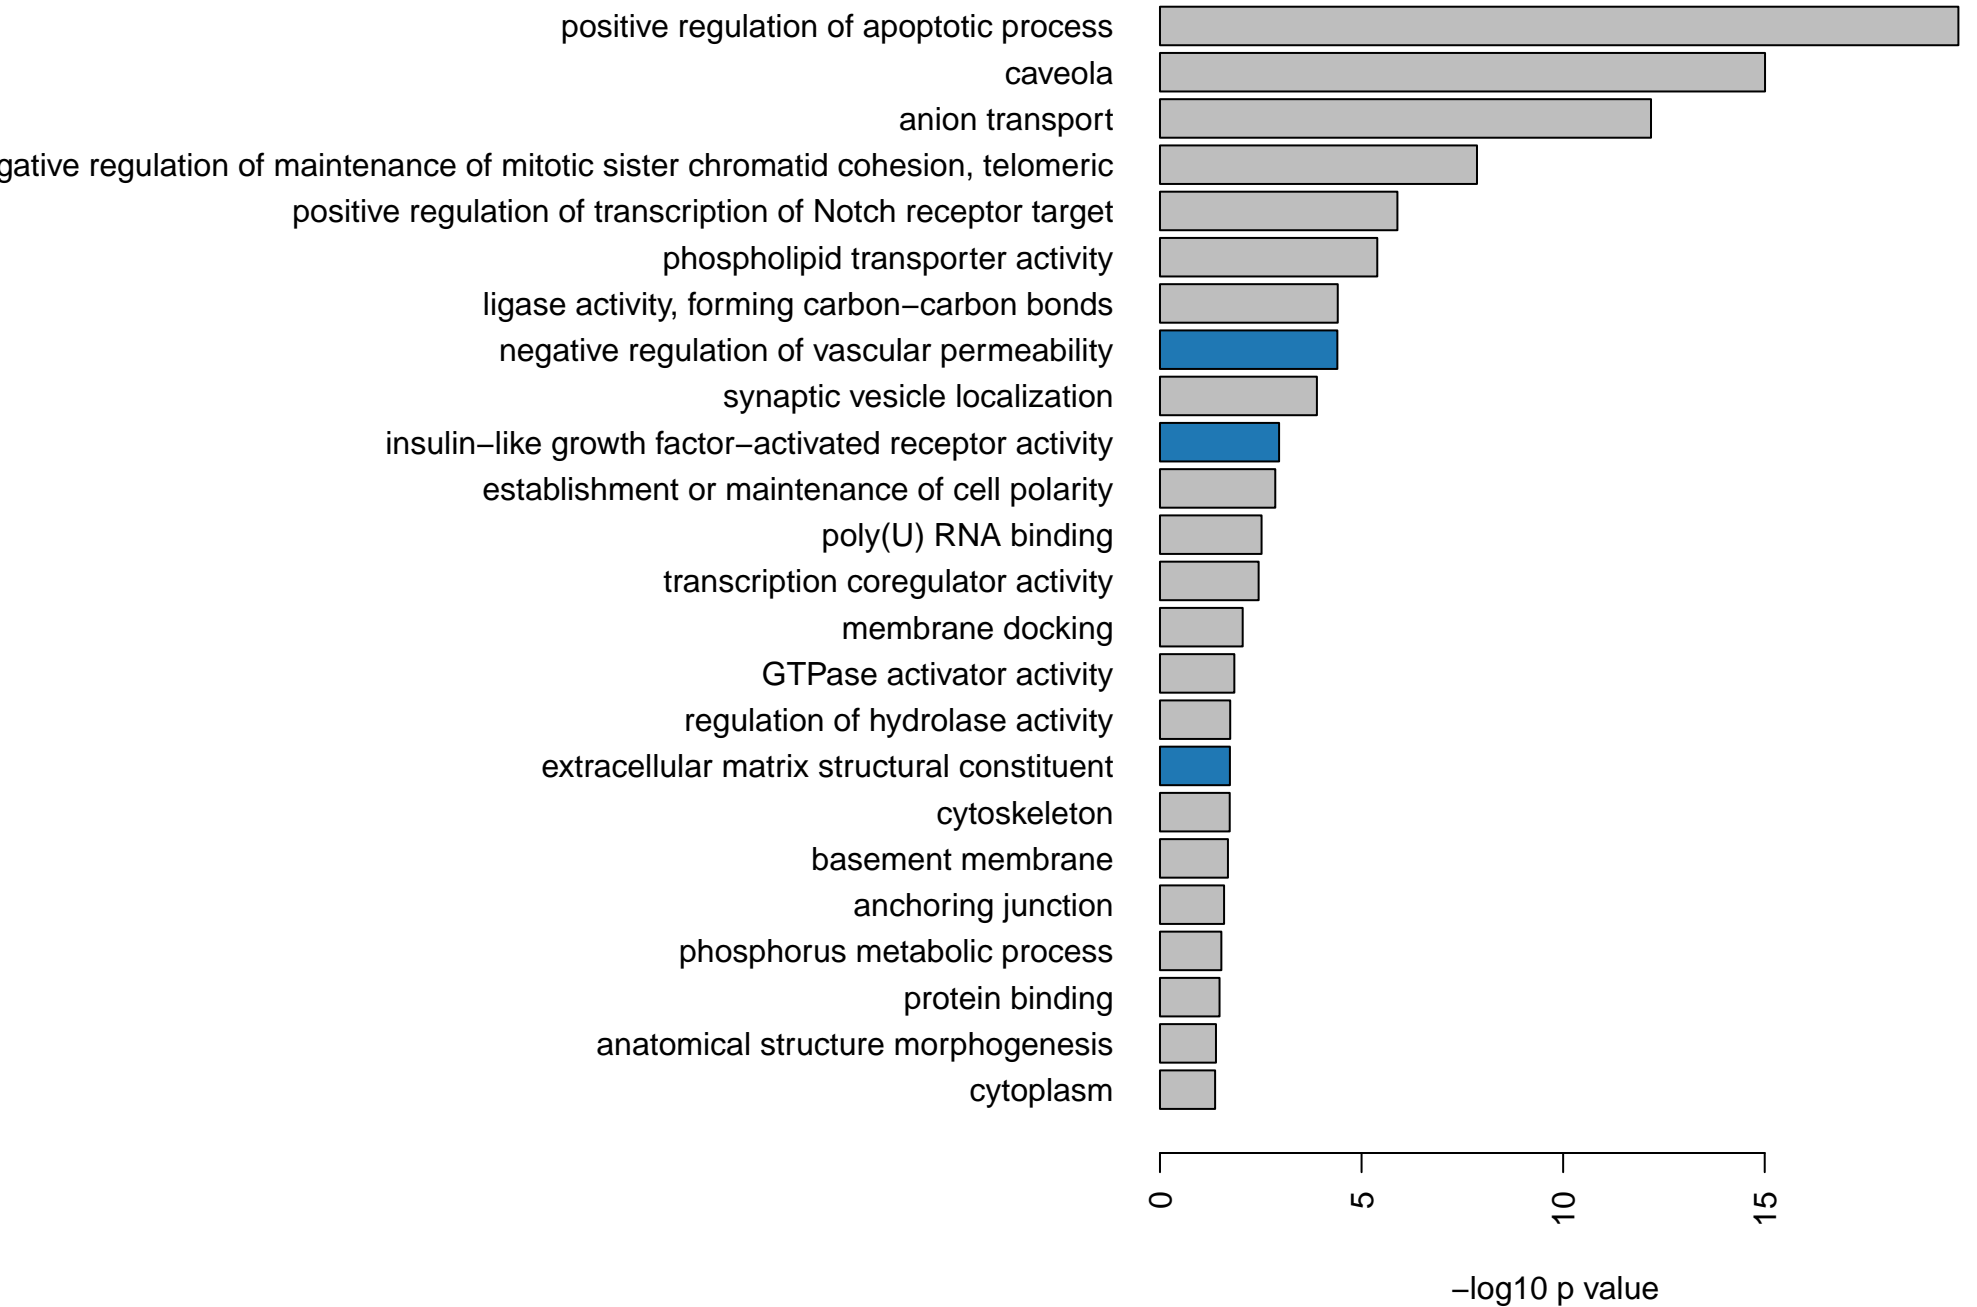

## Enrichment of Genes Significantly Correlated with RBMS3\_MSI2 in Skin

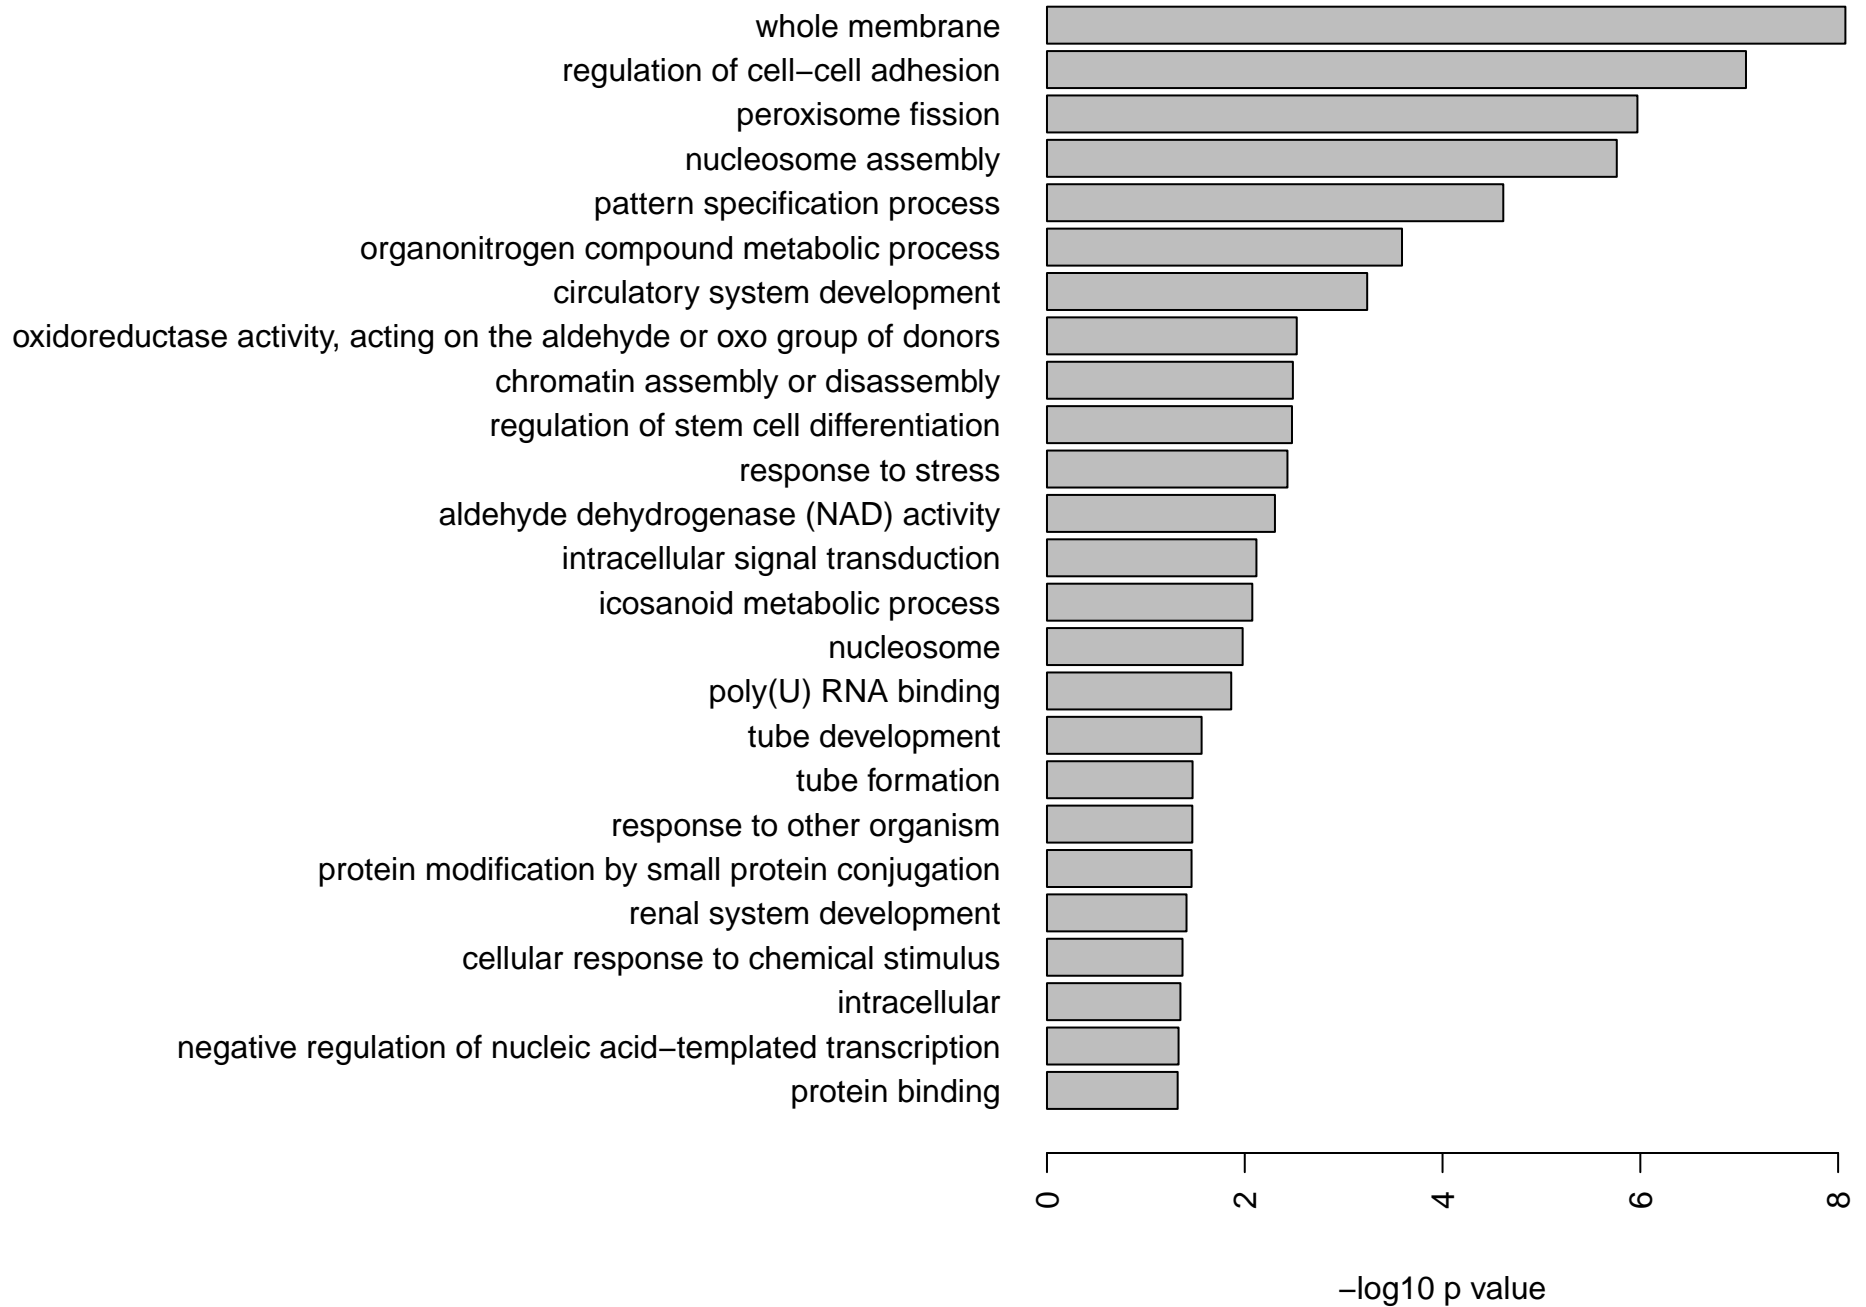

## Enrichment of Genes Significantly Correlated with RBMS3\_MSI2 in SSc

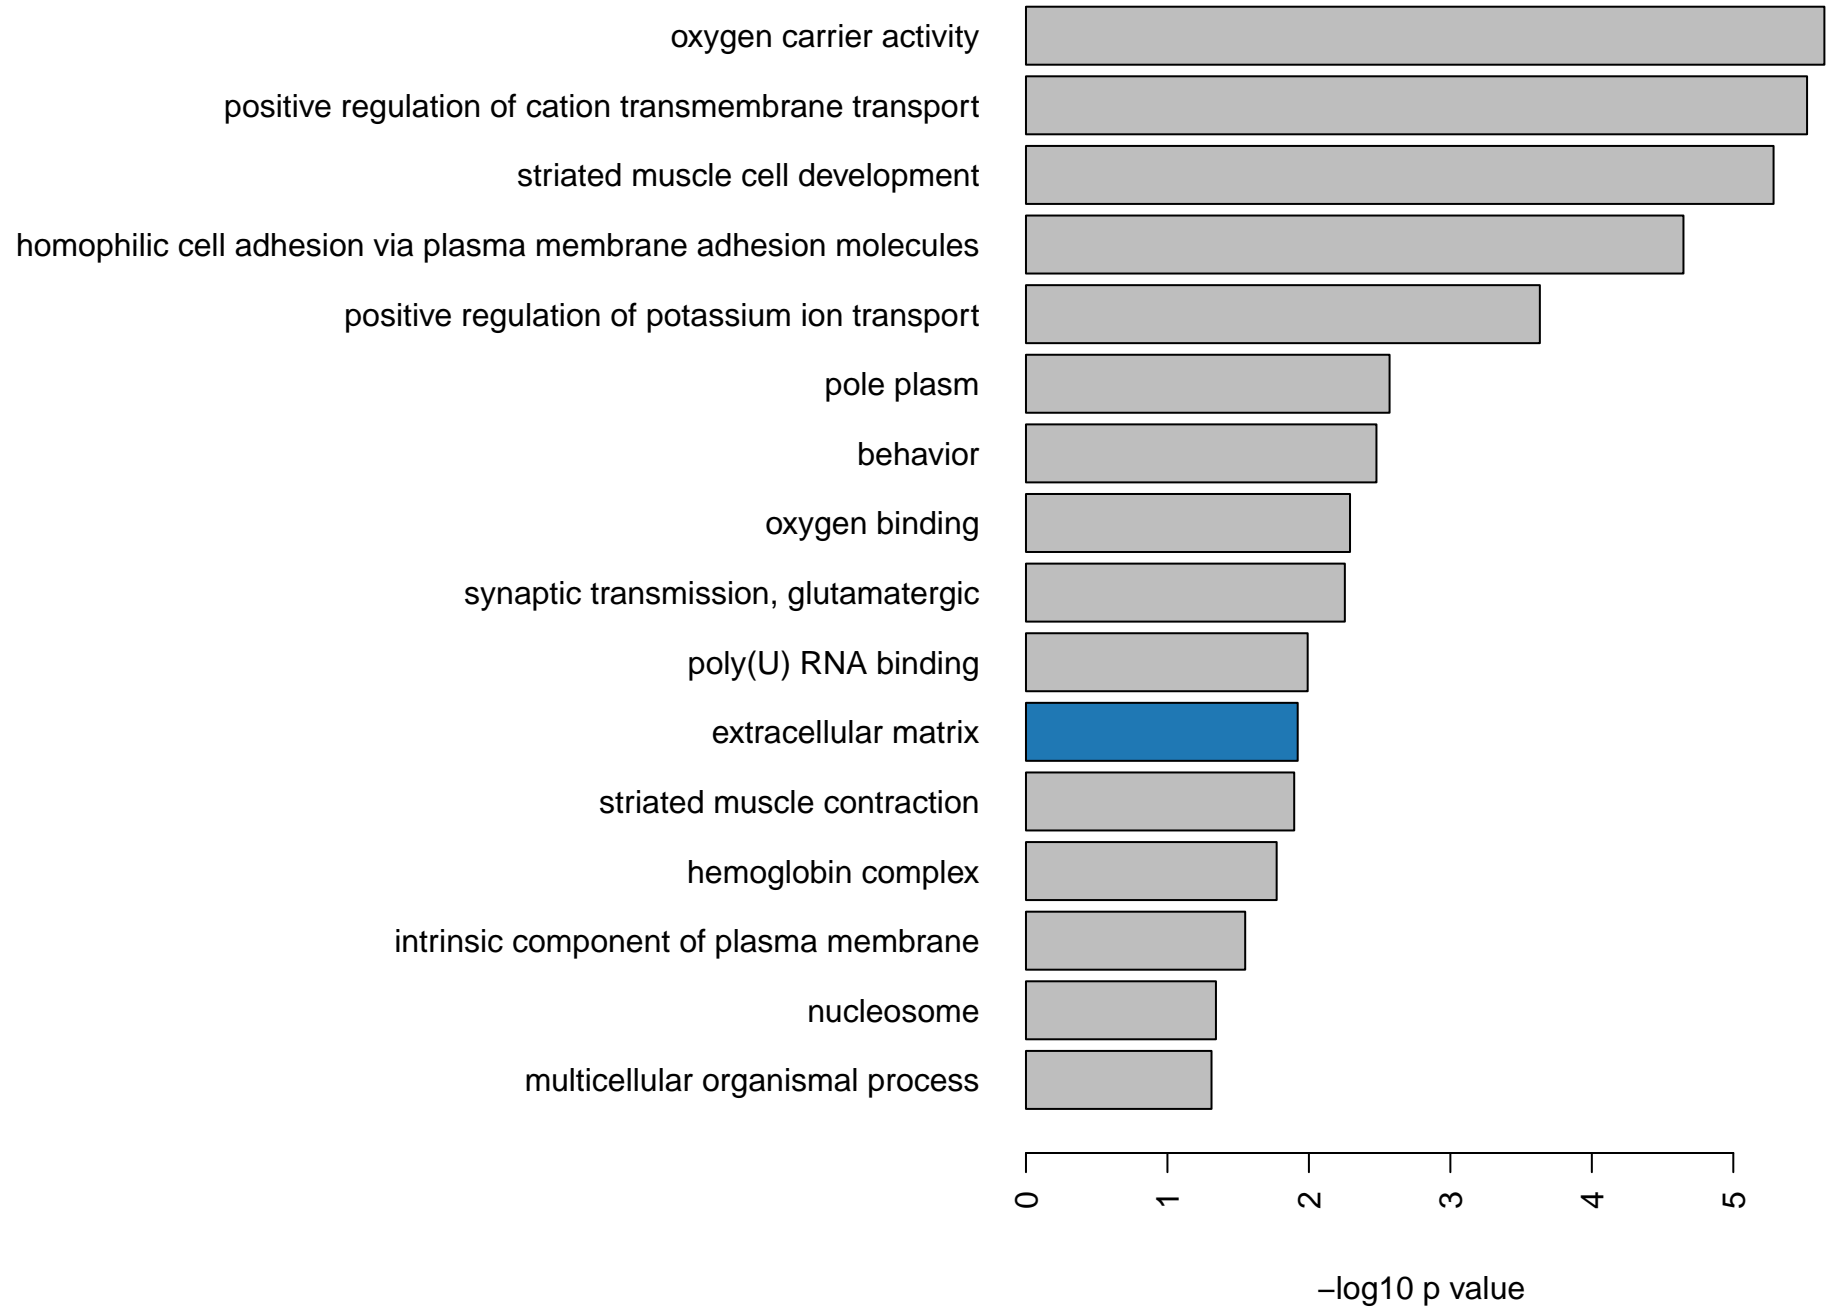

Enrichment of Genes Significantly Correlated with  
RBMS3\_WNT5A in All

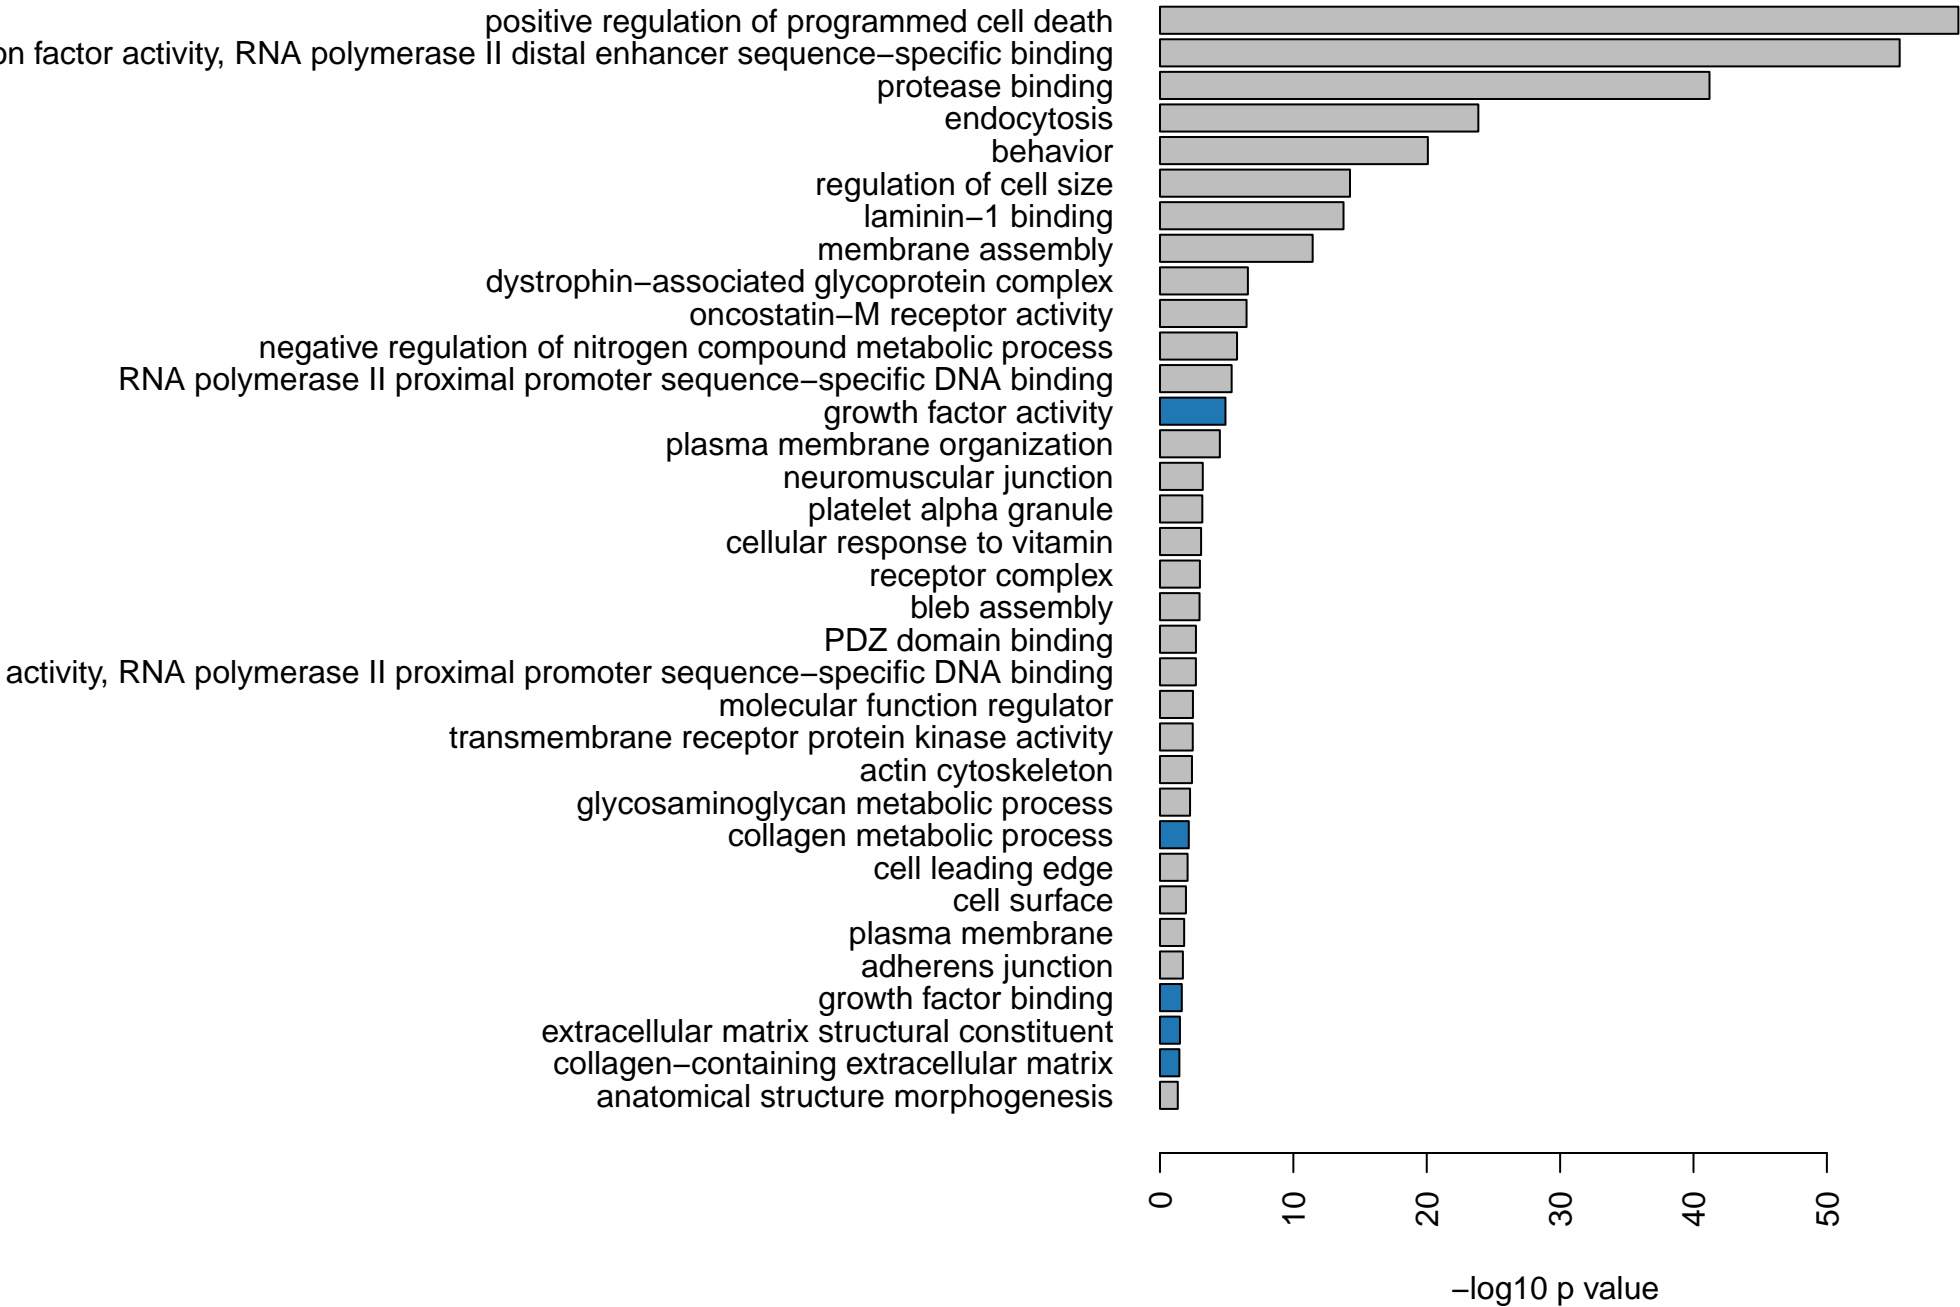

## Enrichment of Genes Significantly Correlated with RBMS3\_WNT5A in Autoimmune

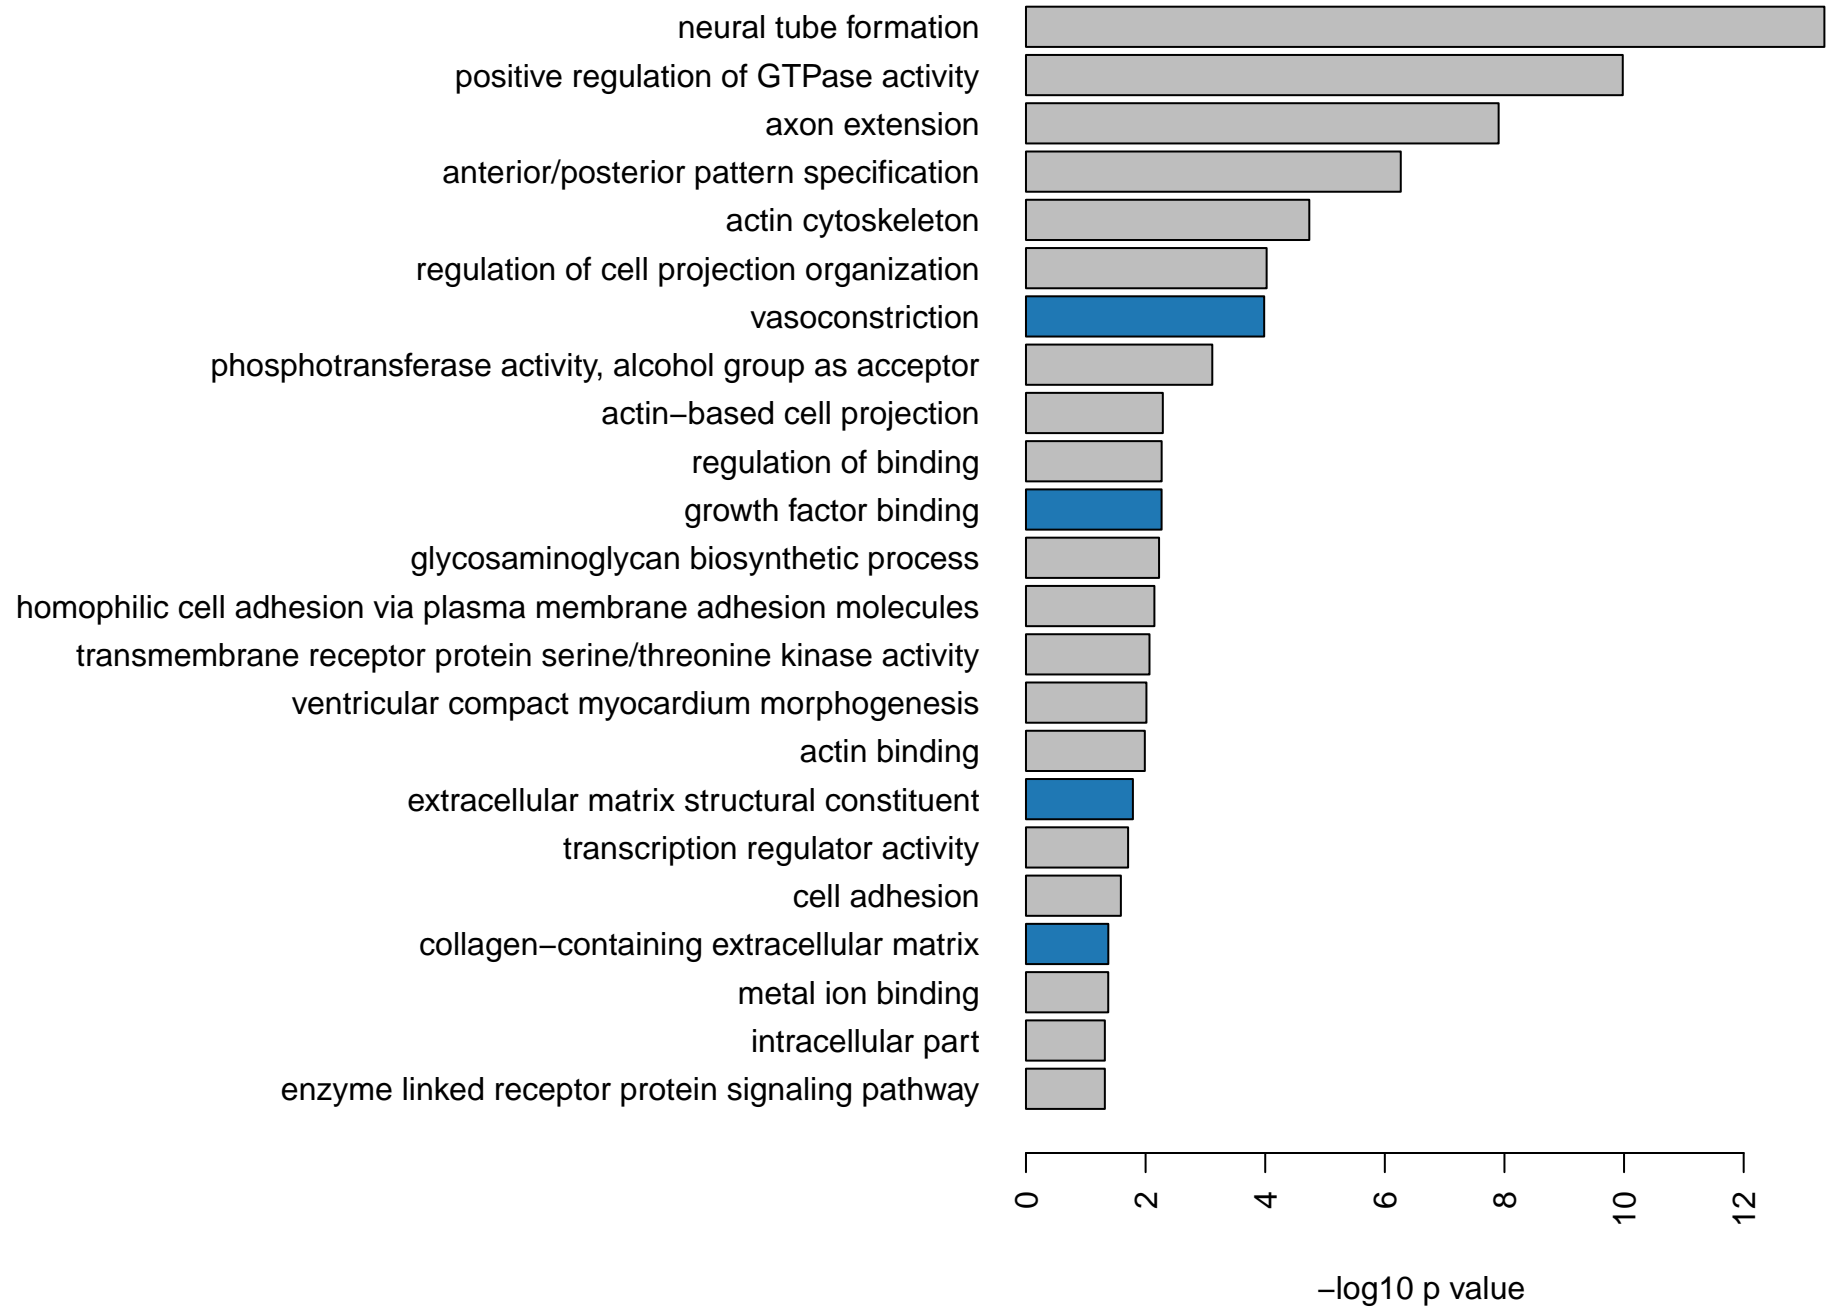

**Enrichment of Genes Significantly Correlated with  
RBMS3\_WNT5A in EMT**

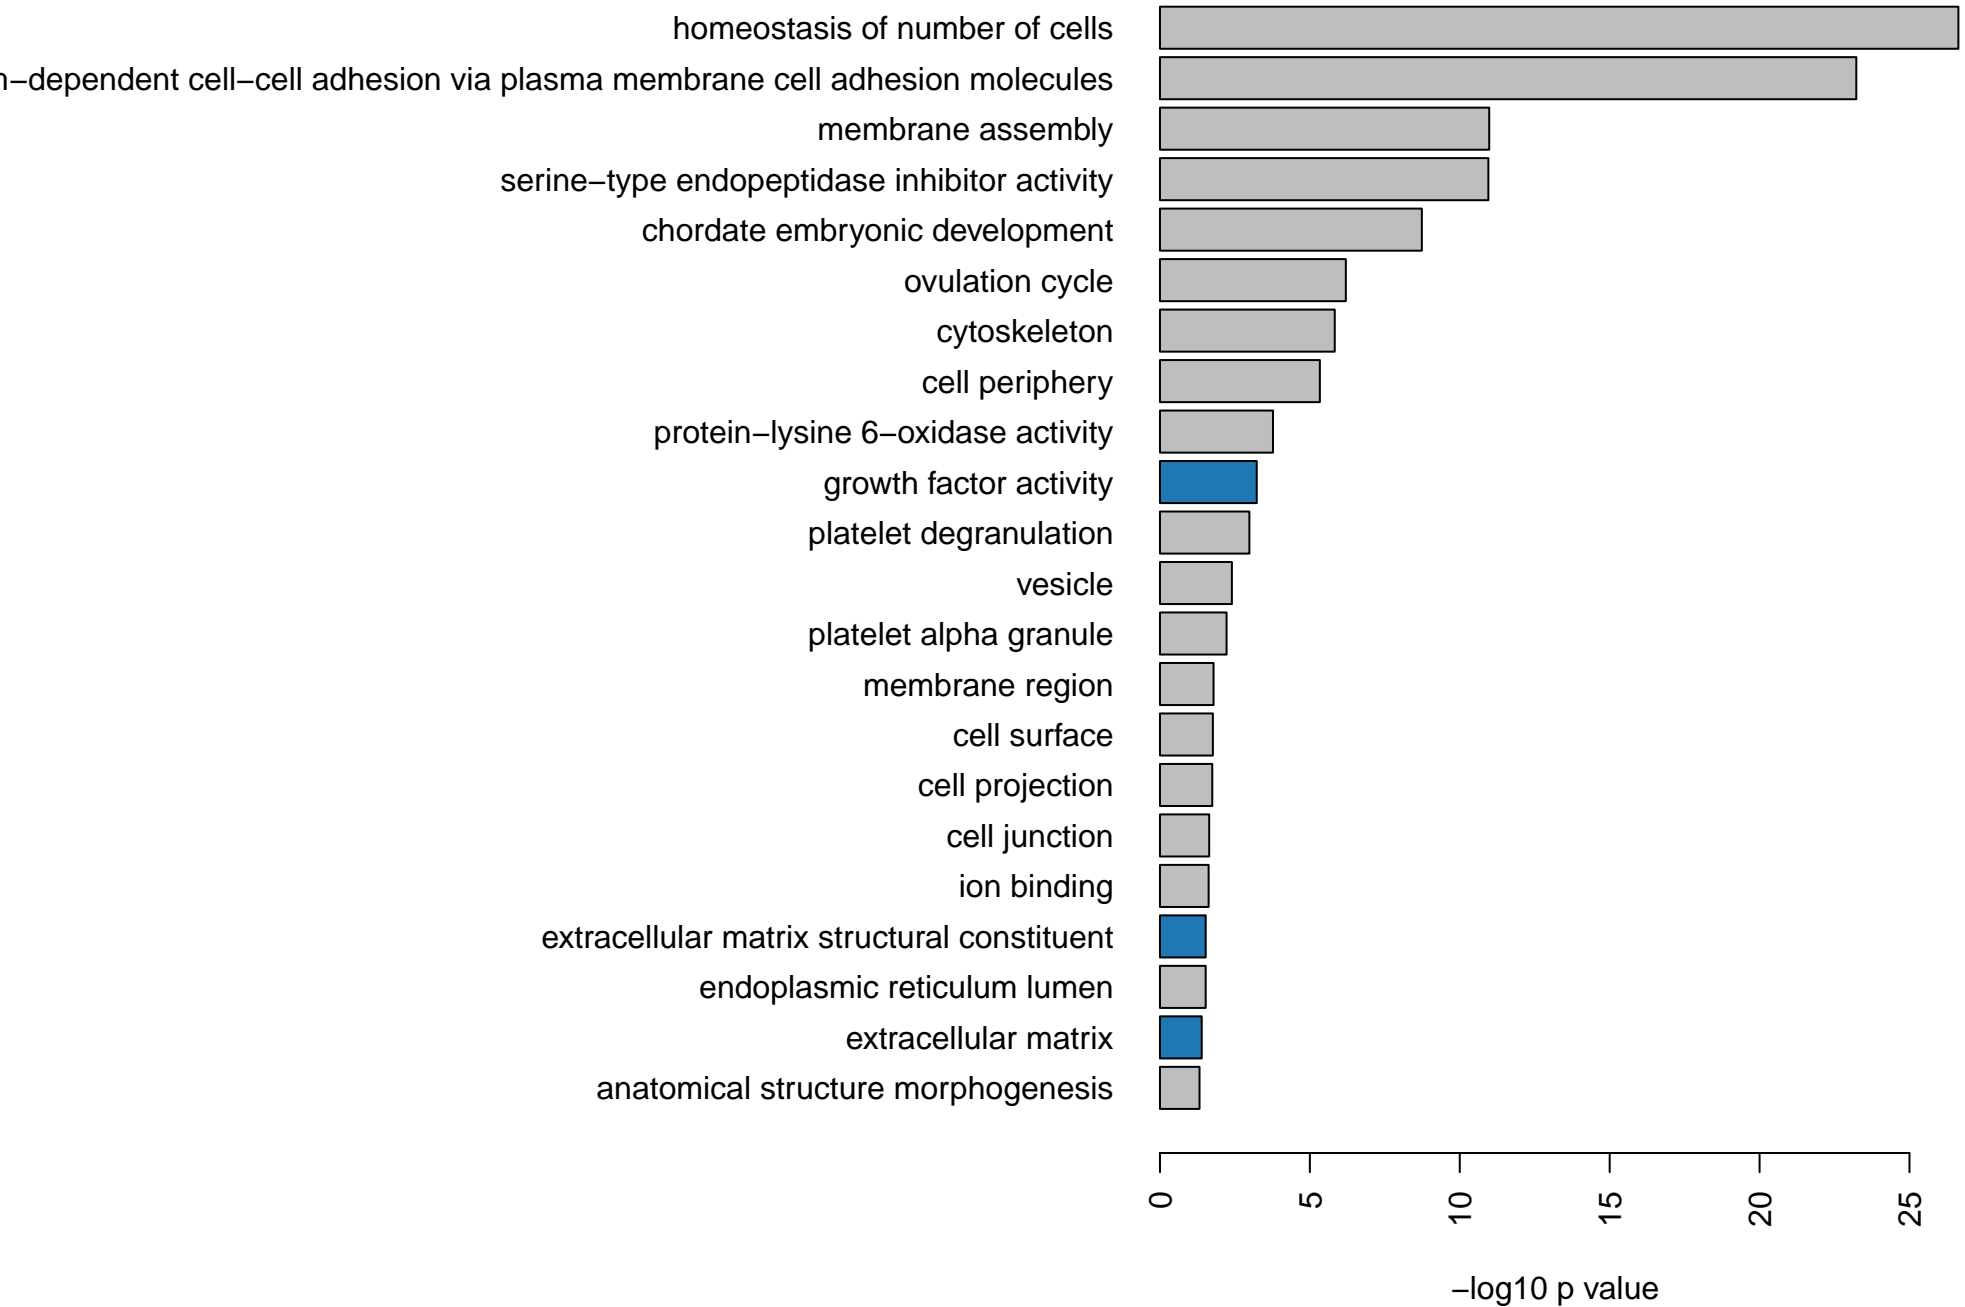

# Enrichment of Genes Significantly Correlated with RBMS3\_WNT5A in Fibrosis

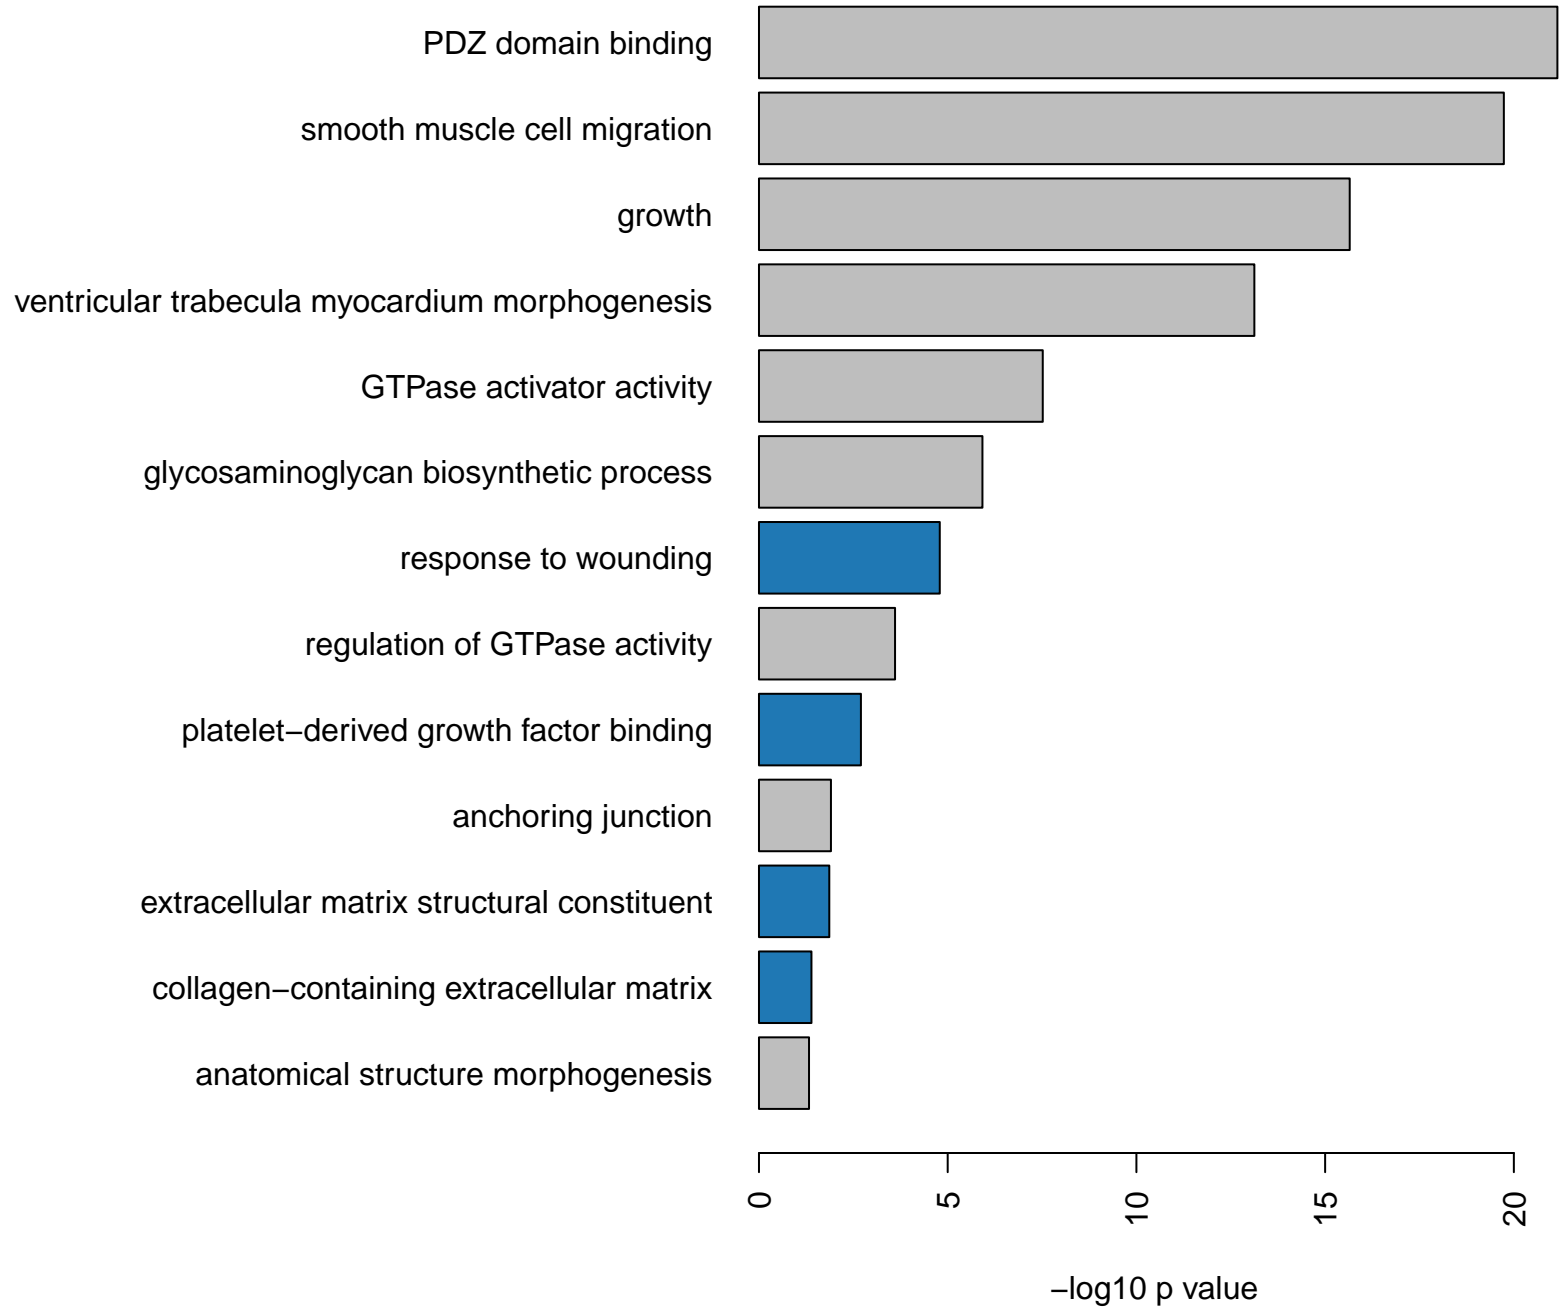

## Enrichment of Genes Significantly Correlated with RBMS3\_WNT5A in ILD\_PAH

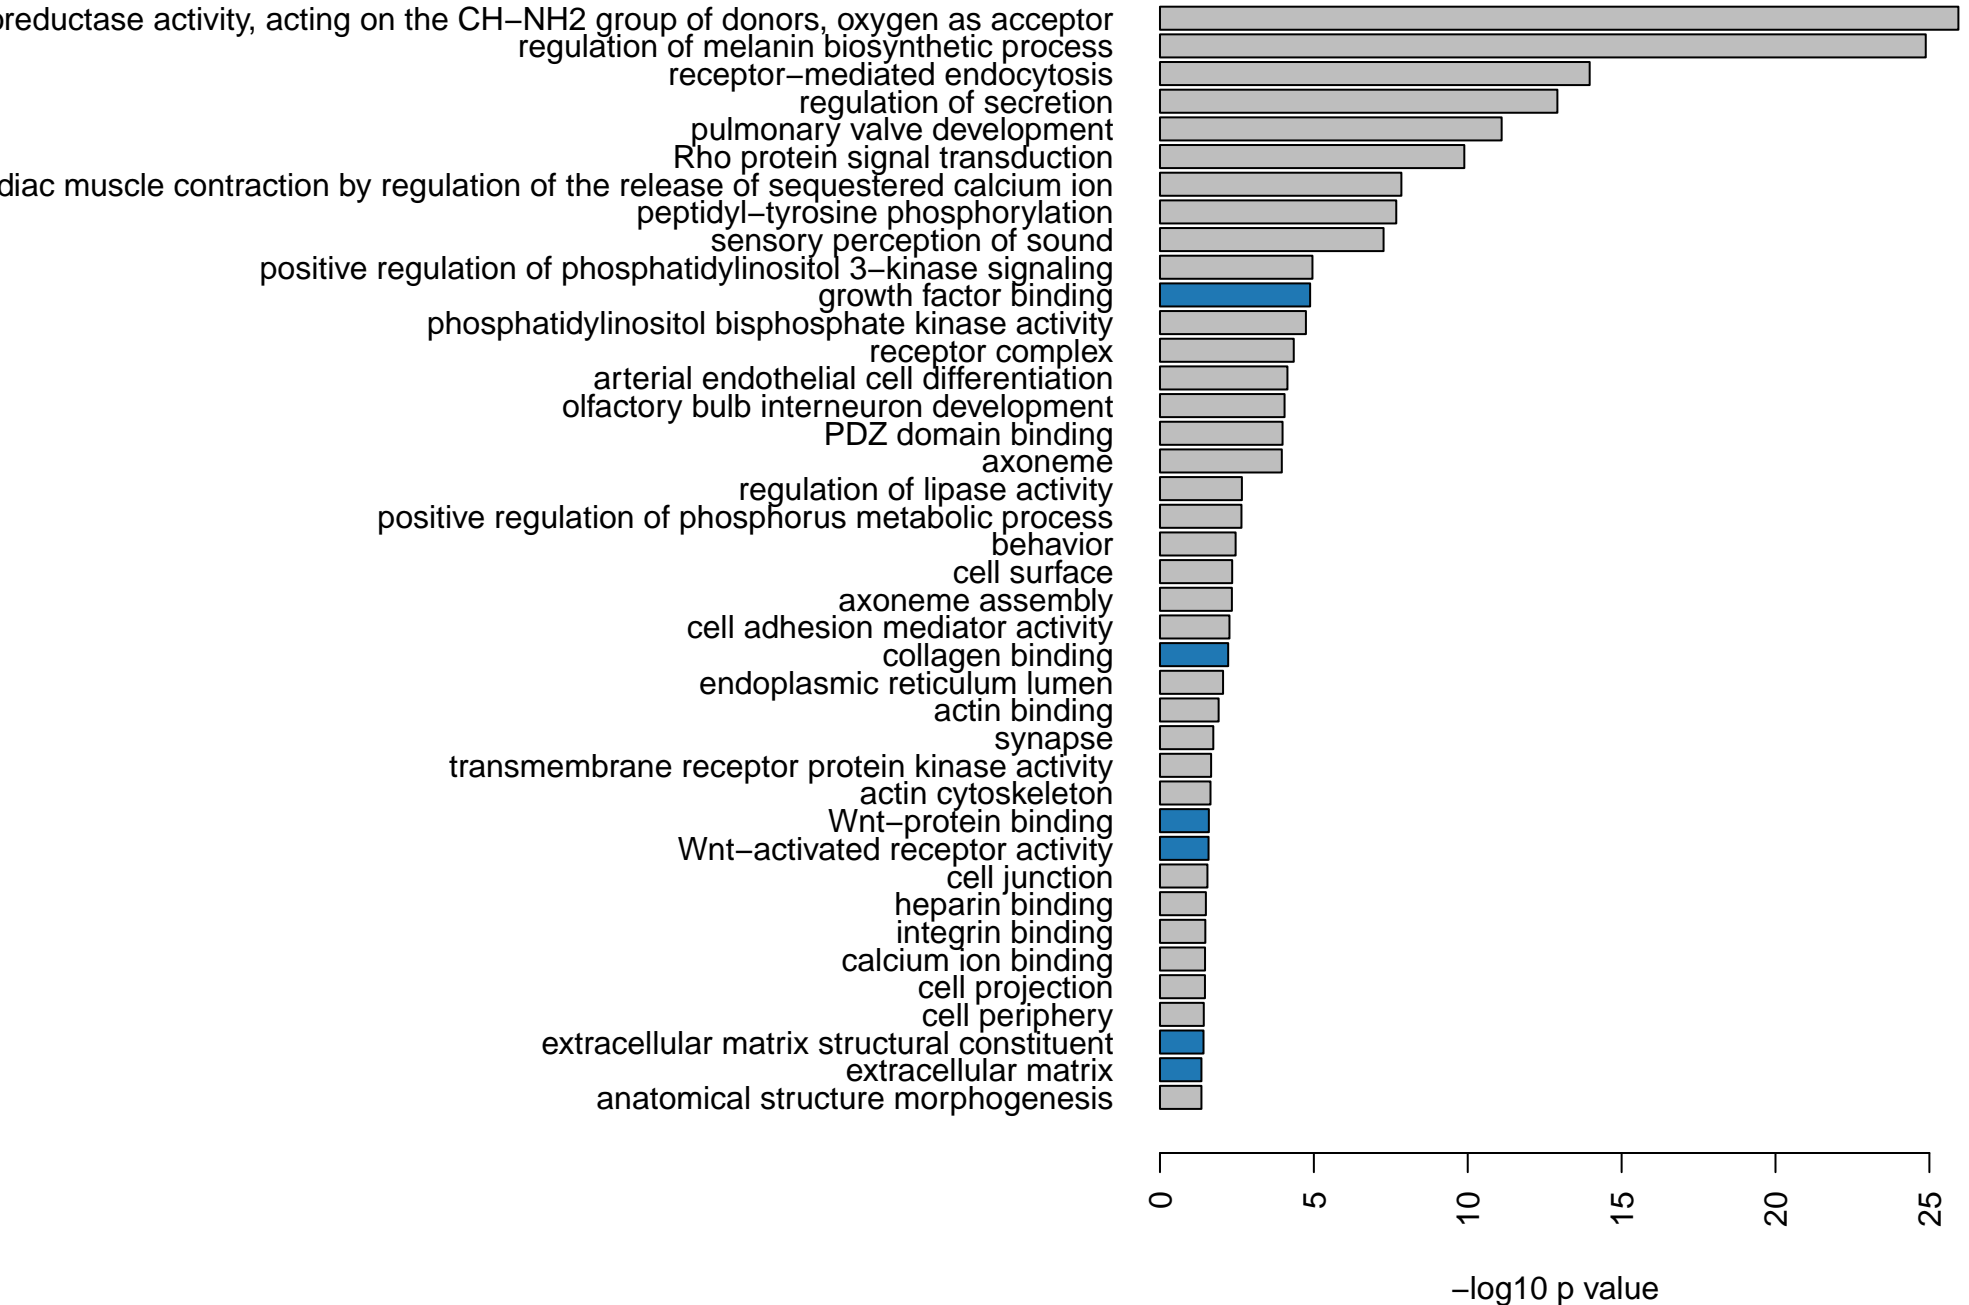

## Enrichment of Genes Significantly Correlated with RBMS3\_WNT5A in Lung

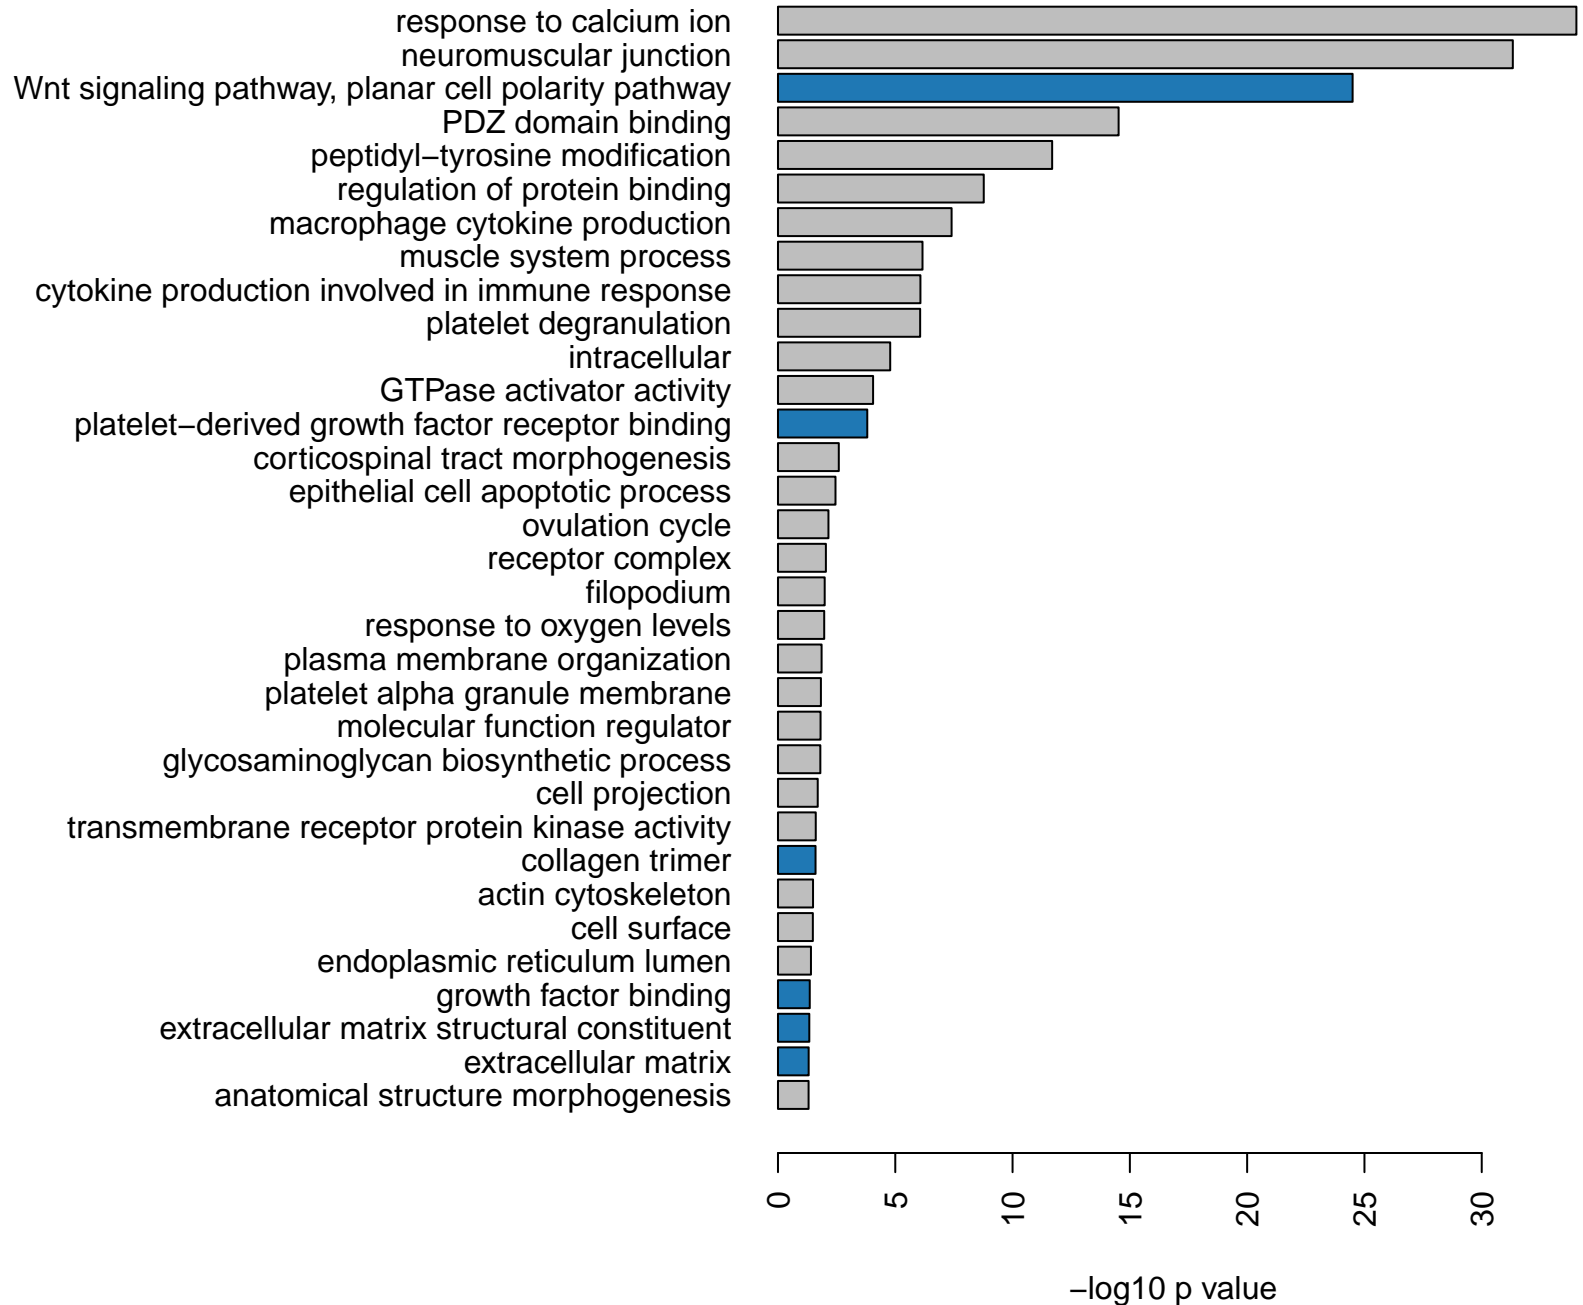

## Enrichment of Genes Significantly Correlated with RBMS3\_WNT5A in Skin

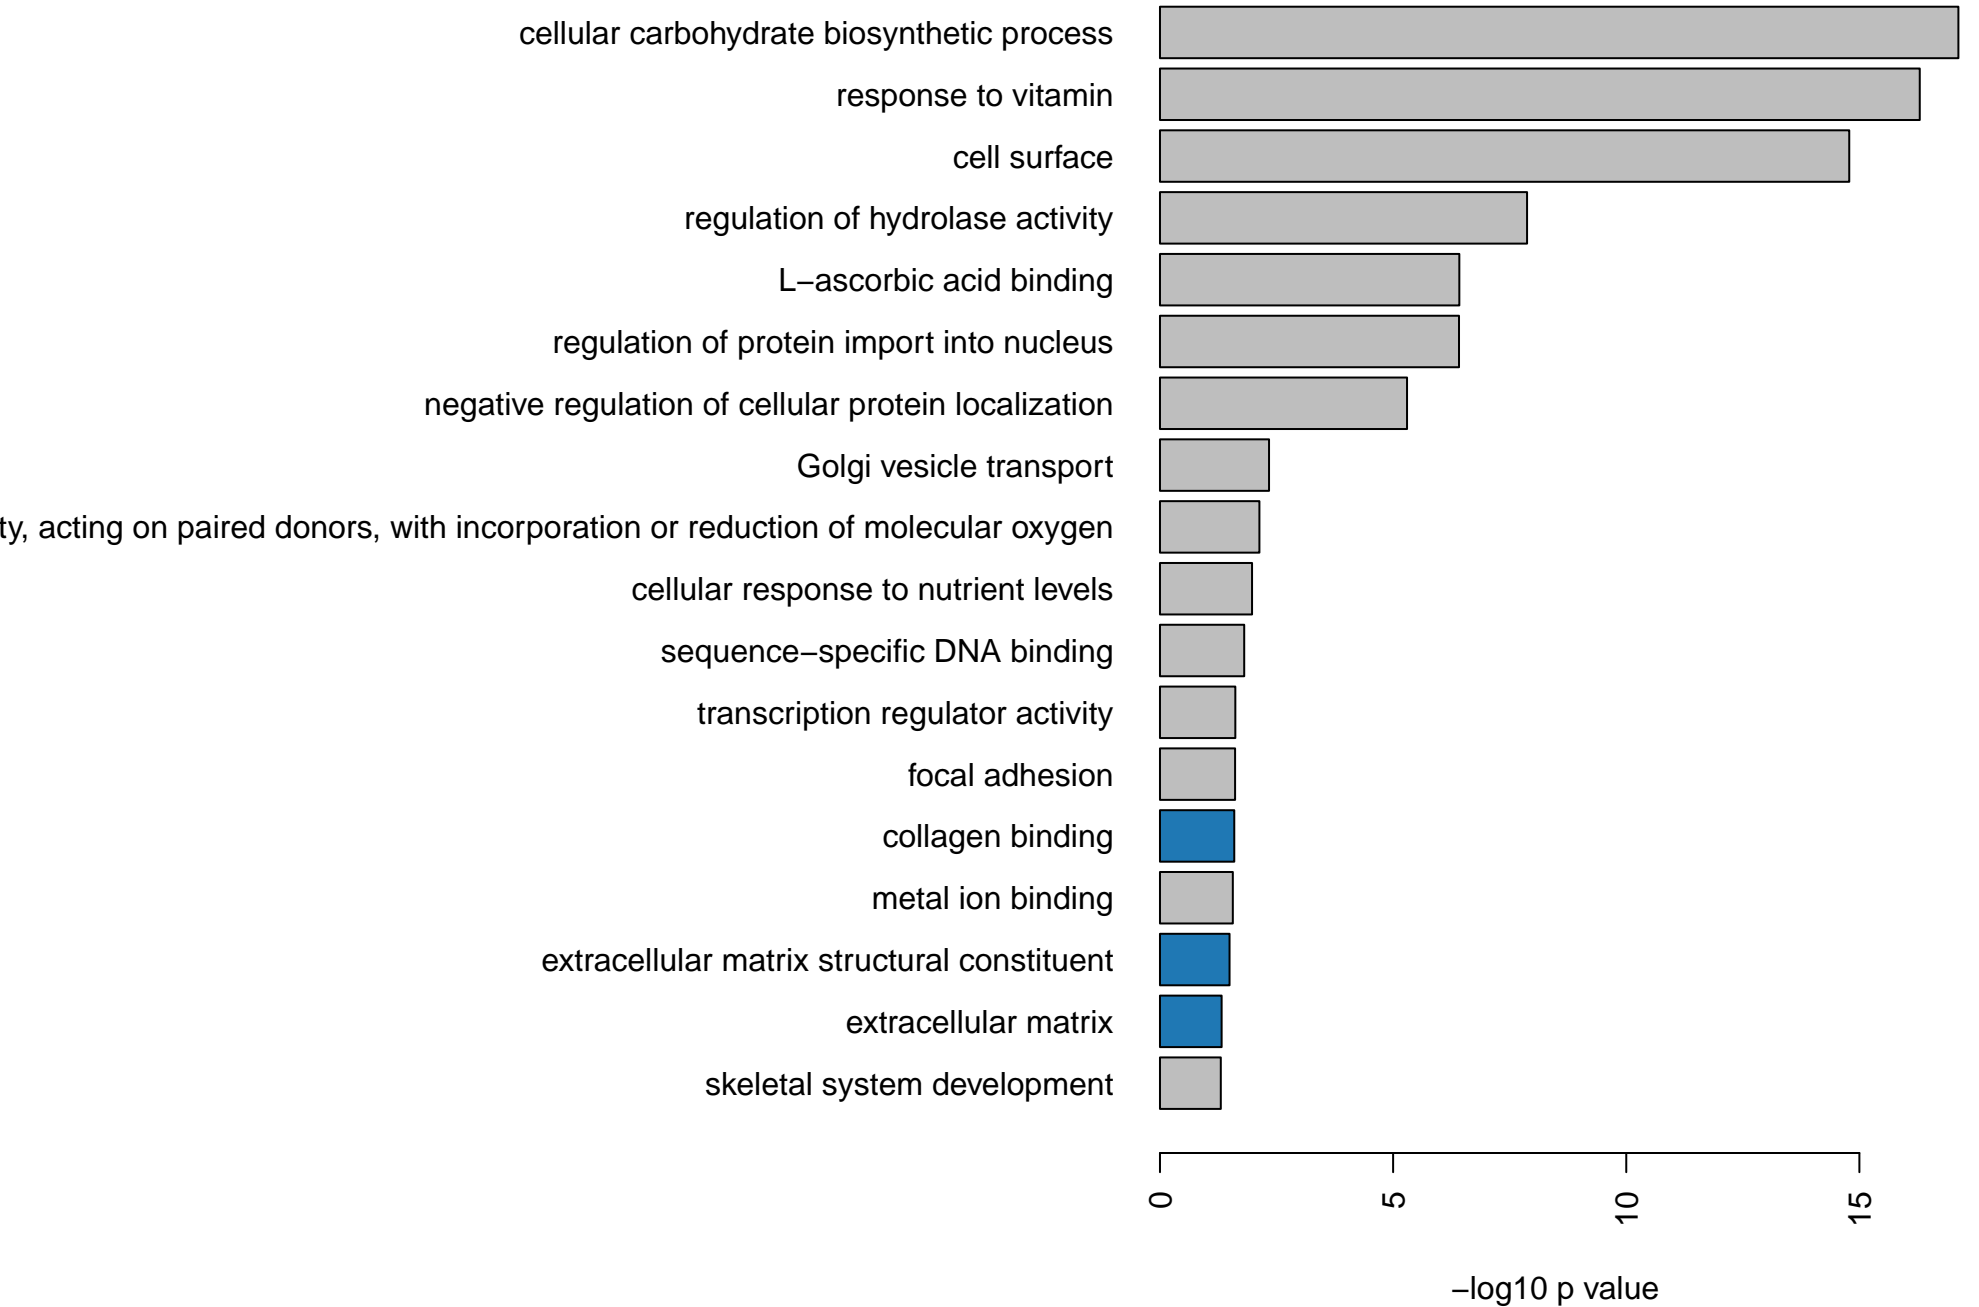

## Enrichment of Genes Significantly Correlated with RBMS3\_WNT5A in SSc

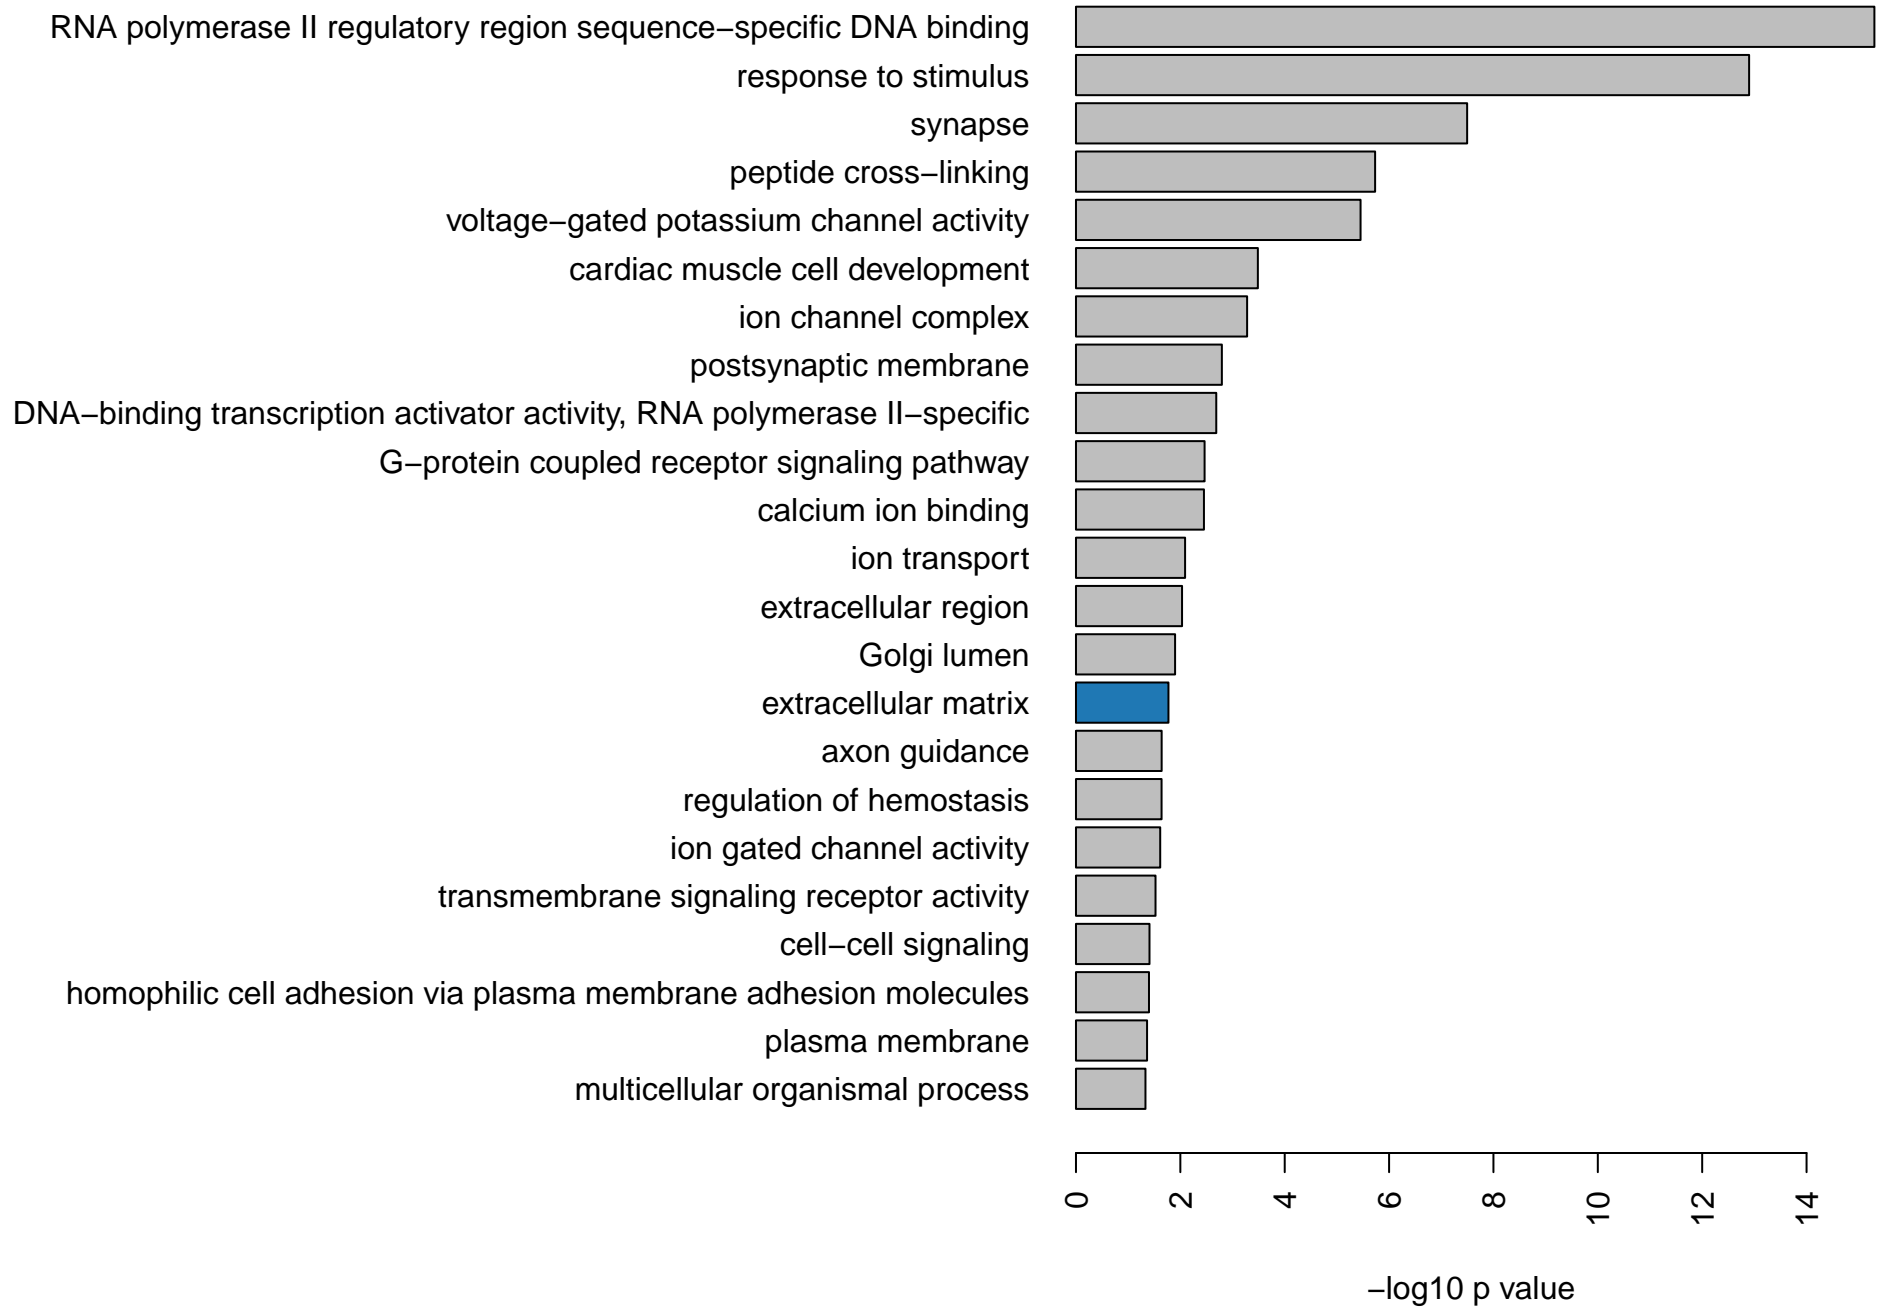

Supplement: Supplementary file 1 [file 1]
